# Supplementary material for: Comprehensive Analysis of Combining Ability and Genetic Parameters for Green Fodder Yield and Quality Traits in Indian Cowpea (Vigna unguiculata L.)
Source: Research Square preprint supplement (doi:10.21203/rs.3.rs-4916238/v1), 2024-10-02
Supplement: Supplementary file 1 [file 478d79b853e3c26c71b59eb9.docx]

| NO | Genotypes | Origin | Characterization |
| --- | --- | --- | --- |
| Line |  |  |  |
| L1 | CL 348 | Pantnagar | High biomass yield, good forage quality, moderate drought tolerance, and resistance to common diseases. |
| L2 | CL 321-1 | Pantnagar | Early maturing, high leaf-to-stem ratio, suitable for silage and green fodder. |
| L3 | N 311 | Coimbatore | Vigorous growth, high protein content, suitable for mixed cropping systems. |
| L4 | IFC 9304 | IGFRI, Jhansi | High digestibility, tolerance to low soil fertility, and good regrowth potential. |
| L5 | IFC 9402 | IGFRI, Jhansi | Suitable for multiple cuttings, good palatability, and high nutrient content. |
| L6 | CS 98 | Hisar | High biomass production, resistance to pest and diseases, and good drought tolerance. |
| L7 | FD 711 | TNAU, Coimbatore | Good forage quality, early maturing, and high leaf yield. |
| L8 | FD 719 | TNAU, Coimbatore | High dry matter yield, resistant to waterlogging, and good regrowth after cutting. |
| L9 | FD 1052 | TNAU, Coimbatore | Excellent forage quality, high protein content, and resistance to foliar diseases. |
| L10 | FD 1067 | TNAU, Coimbatore | High biomass yield, good palatability, and adaptability to various agro-climatic conditions. |
| L11 | FD 1259 | TNAU, Coimbatore | Vigorous growth, suitable for multiple cuttings, and high nutrient content. |
| L12 | EC 467380 | NBPGR, New Delhi | High fodder yield, early maturing, adaptable to various conditions. |
| L13 | EC 240806 | NBPGR, New Delhi | High biomass production, pest resistance, good drought tolerance. |
| L14 | K – 13 -CP42 | TNAU, Coimbatore | High yield, pest and disease resistant, good adaptability. |
| L15 | GETC 6 | TNAU, Coimbatore | High biomass production, resistant to major diseases, suitable for dryland. |
| L16 | GETC 10 | TNAU, Coimbatore | High forage yield, good regrowth, drought tolerant. |
| L17 | GETC 15 | TNAU, Coimbatore | High protein content, resistant to pests, high yield. |
| L18 | GETC 18 | TNAU, Coimbatore | Good biomass yield, early maturing, pest resistant. |
| L19 | GETC 21 | TNAU, Coimbatore | High yield, good forage quality, drought tolerant. |
| L20 | GETC 23 | TNAU, Coimbatore | High biomass, pest resistant, good regrowth. |
| L21 | GETC 40 | TNAU, Coimbatore | High forage yield, adaptable to various soils, pest resistant. |
| L22 | GETC 41 | TNAU, Coimbatore | High nutritional value, drought tolerant, high yield. |
| L23 | GETC 49 | TNAU, Coimbatore | High biomass production, early maturing, resistant to pests. |
| Testers |  |  |  |
| T1 | CoFC 8 | TNAU, Coimbatore | High yield, good regrowth, resistant to major diseases. |
| T2 | Co- 9 | TNAU, Coimbatore | High protein content, pest resistant, good adaptability. |
| T3 | TNFC0926 | TNAU, Coimbatore | High biomass, good forage quality, drought tolerant. |

**Table 1** Fodder cowpea genotypes used in this study.

**Table 2** Analysis of variance for fodder yield contributing characters during two growing seasons

| **Variation Sources `** | **d.f** | **DMY** |  | **DFF** |  | **GFY** |  | **PH** |  |
| --- | --- | --- | --- | --- | --- | --- | --- | --- | --- |
|  |  | **Y1** | **Y2** | **Y1** | **Y2** | **Y1** | **Y2** | **Y1** | **Y2** |
| Replications | 2 | 9.638 | 8.88 | 0.001 | 6.77 | 545.719 | 130.809 | 115.95* | 21.355 |
| Genotypes(G) | 94 | 455.032** | 491.843** | 89.371** | 49.502** | 6127.3** | 12810** | 105.81** | 998.388** |
| Parents(P) | 25 | 59.763** | 27.656** | 80.524** | 52.333** | 1428.7** | 10054** | 94.075** | 2065** |
| Parents vs. Crosses | 1 | 16163** | 31421.5** | 0.254* | 23.263* | 148559** | 368163** | 327.39** | 820.646** |
| Crosses(C) | 68 | 369.350** | 207.651** | 93.934** | 48.848** | 5760** | 8597.8** | 106.87** | 608.774 ** |
| Lines (L) | 22 | 841.102** | 362.218** | 282.60** | 111.334** | 14469** | 24326** | 181.22** | 890.059* |
| Testers(T) | 2 | 31.759 | 204.342 | 70.974** | 54.465* | 2189** | 2082.779 | 316.34** | 255.2775 |
| L X T | 44 | 148.819** | 130.518** | 0.643** | 17.350** | 1567.788 | 1029.8** | 60.17** | 484.200** |
| Error | 188 | 5.181 | 3.0246 | 0.066 | 7.225 | 393.096 | 394.338 | 35.361 | 38.634 |
|  |  |  |  |  |  |  |  |  |  |
|  |  |  |  |  |  |  |  |  |  |
| Variation Sources | d.f | NOL |  | LL |  | ASH |  | CPR |  |
|  |  | Y1 | Y2 | Y1 | Y2 | Y1 | Y2 | Y1 | Y2 |
| Replications | 2 | 480.95** | 276.470* | 0.005 | 0.348 | 0.061 | 27.0227** | 0.995 | 0.033 |
| Genotypes(G) | 94 | 430.598** | 373.717** | 3.302** | 4.937** | 1.448** | 0.859 | 0.754** | 1.166** |
| Parents(P) | 25 | 76.718 | 207.73** | 1.7987** | 1.641** | 0.755** | 0.872 | 1.156** | 1.061** |
| Parents vs. Crosses | 1 | 12533.6** | 2777.531** | 110.122** | 132.982** | 31.513** | 26.650** | 26.510** | 40.435** |
| Crosses(C) | 68 | 382.715** | 399.388** | 2.284** | 4.266** | 1.261** | 0.475 | 0.227 | 0.627** |
| Lines (L) | 22 | 953.235** | 1087.446** | 4.0853** | 4.523 | 1.763* | 0.788** | 0.273 | 0.696 |
| Testers(T) | 2 | 186.795 | 56.782 | 0.5109 | 7.077 | 1.513 | 0.243 | 0.537* | 0.549 |
| L X T | 44 | 106.361 | 70.933 | 1.4645** | 4.010** | 0.999** | 0.329 | 0.190 | 0.596** |
| Error | 188 | 118.169 | 111.024 | 0.1288 | 0.262 | 0.216 | 0.712 | 0.441 | 0.144 |
|  |  |  |  |  |  |  |  |  |  |
|  |  |  |  |  |  |  |  |  |  |
|  |  |  |  |  |  |  |  |  |  |
|  |  |  |  |  |  |  |  |  |  |
| **Variation Sources** | **d.f** | CFB |  | CFT |  | NPB |  | LSR |  |
|  |  | Y1 | Y2 | Y1 | Y2 | **Y1** | **Y2** | **Y1** | **Y2** |
| Replications | 2 | 0.221 | 18.67** | 1.908** | 0.016 | 0.084 | 0.731** | 0.002 | 0.332** |
| Genotypes(G) | 94 | 18.763** | 15.77** | 0.756** | 1.121** | 1.892** | 2.814** | 0.021** | 0.007 |
| Parents(P) | 25 | 5.263** | 2.60** | 0.215 | 0.316** | 0.328** | 0.375** | 0.015** | 0.008 |
| Parents vs. Crosses | 1 | 647.38** | 912.200** | 2.998** | 33.488** | 2.680** | 54.483** | 0.009 | 0.204** |
| Crosses(C) | 68 | 14.481** | 7.436** | 0.923** | 0.941** | 2.456** | 2.951** | 0.024 | 0.004 |
| Lines (L) | 22 | 40.495** | 18.76** | 2.061** | 2.523** | 7.544** | 9.081** | 0.029** | 0.009** |
| Testers(T) | 2 | 0.215 | 1.864 | 0.021 | 0.430* | 0.443** | 0.335** | 0.017 | 0.0001 |
| L X T | 44 | 2.123** | 2.025 | 0.394 | 0.174 | 0.004** | 0.004 | 0.022** | 0.002 |
| Error | 188 | 0.570 | 1.507 | 0.322 | 0.166 | 0.060 | 0.096 | 0.006 | 0.010 |

* and** and Significant at P=0.05 and P=0.01 levels, respectively. D.F-Degrees of freedom, NPB-Number of primary branches per plant, PH-Plant height (cm), NOL-Number of leaves per plant, CFB-Crude fibre content (%), CFT-Crude fat content (%), DMY-Dry matter yield per plant (g), DFF-Days to 50% flowering, CPR-Crude protein content (%), GFY-Green fodder yield per plant (g), LSR- Leaf stem ratio, LL- Leaf length(cm), and LW- Leaf width(cm).

**Table 3:** The mean performances of twenty-three parental lines and three testers for fodder yield and fodder quality traits over two years using line × tester hybrid of cowpea.

| Genotype | **DMY** |  | **DFF** |  | **GFY** | |  | | **PH** |  | **NOL** |  |
| --- | --- | --- | --- | --- | --- | --- | --- | --- | --- | --- | --- | --- |
|  | **Line** |  |  |  |  | |  | |  |  |  |  |
| CL 348 | 30.84 | 31.42 | 47.50 | 49.52 | 259.33 | | 135.44 | | 95.00 | 98.46 | 65.89 | 71.60 |
| CL 321-1 | 38.63 | 37.12 | 48.31 | 49.50 | 219.33 | | 126.59 | | 94.07 | 85.73 | 61.38 | 38.60 |
| N 311 | 37.82 | 32.04 | 49.19 | 52.79 | 238.00 | | 117.58 | | 94.36 | 85.13 | 61.86 | 42.34 |
| IFC 9304 | 35.22 | 30.85 | 50.37 | 50.40 | 237.00 | | 120.65 | | 91.22 | 90.18 | 62.99 | 48.60 |
| IFC 9402 | 30.22 | 29.69 | 50.65 | 52.16 | 237.67 | | 115.85 | | 93.60 | 20.61 | 58.88 | 46.60 |
| CS 98 | 37.74 | 31.28 | 51.71 | 55.19 | 267.67 | | 190.66 | | 91.27 | 49.47 | 63.09 | 54.30 |
| FD 711 | 37.79 | 37.43 | 52.85 | 54.81 | 240.67 | | 167.21 | | 91.39 | 57.46 | 70.71 | 55.23 |
| FD 719 | 41.74 | 35.93 | 53.33 | 51.65 | 255.67 | | 111.05 | | 90.50 | 79.18 | 74.04 | 59.82 |
| FD 1052 | 37.77 | 32.14 | 53.76 | 56.41 | 195.00 | | 219.01 | | 84.07 | 70.68 | 75.25 | 62.29 |
| FD 1067 | 29.17 | 28.46 | 54.97 | 56.54 | 254.67 | | 227.75 | | 89.46 | 101.64 | 69.61 | 55.51 |
| FD 1259 | 44.18 | 37.38 | 56.00 | 55.57 | 255.33 | | 201.70 | | 83.29 | 67.08 | 74.55 | 42.45 |
| EC 467380 | 25.98 | 37.44 | 56.46 | 55.69 | 192.67 | | 245.02 | | 87.21 | 60.79 | 74.76 | 42.24 |
| EC 240806 | 30.68 | 31.55 | 57.24 | 57.65 | 266.00 | | 258.20 | | 79.84 | 13.10 | 69.76 | 43.76 |
| K – 13 -CP42 | 47.94 | 28.12 | 58.27 | 60.50 | 242.00 | | 252.88 | | 83.44 | 92.52 | 77.89 | 53.06 |
| GETC 6 | 32.19 | 35.35 | 59.15 | 57.62 | 222.00 | | 153.29 | | 85.46 | 46.45 | 70.92 | 61.62 |
| GETC10 | 39.81 | 36.98 | 59.72 | 58.49 | 216.48 | | 206.49 | | 78.36 | 111.67 | 67.42 | 53.36 |
| GETC 15 | 32.50 | 33.47 | 60.76 | 62.35 | 219.06 | | 200.58 | | 85.71 | 49.98 | 72.08 | 59.61 |
| GETC 18 | 38.57 | 34.13 | 61.93 | 61.00 | 267.00 | | 166.08 | | 84.42 | 30.14 | 70.05 | 61.63 |
| GETC 21 | 29.44 | 30.29 | 62.24 | 60.52 | 268.86 | | 210.56 | | 77.07 | 61.57 | 70.06 | 50.47 |
| GETC 23 | 27.46 | 34.90 | 62.91 | 62.95 | 277.54 | | 224.07 | | 79.16 | 39.97 | 72.61 | 43.73 |
| GETC 40 | 40.64 | 35.33 | 63.98 | 62.54 | 246.94 | | 354.92 | | 95.30 | 60.26 | 73.05 | 42.31 |
| GETC 41 | 47.34 | 30.04 | 64.84 | 62.85 | 246.78 | | 248.77 | | 92.57 | 32.48 | 71.60 | 46.26 |
| GETC 49 | 38.24 | 31.63 | 64.79 | 54.12 | 234.32 | | 216.57 | | 92.26 | 46.77 | 69.51 | 52.86 |
| Line average | 36.17 | 33.17 | 56.56 | 56.56 | 241.74 | | 194.39 | | 87.78 | 63.10 | 69.48 | 51.66 |
|  | **Tester** |  |  |  |  | |  | |  |  |  |  |
| CO(FC) 8 | 33.88 | 30.89 | 55.03 | 57.76 | 250.33 | | 236.72 | | 93.60 | 48.73 | 67.78 | 51.43 |
| CO 9 | 38.15 | 30.39 | 56.67 | 58.77 | 256.67 | | 213.58 | | 86.60 | 95.25 | 61.80 | 57.06 |
| TNFC0926 | 44.30 | 28.89 | 58.01 | 52.66 | 250.67 | | 258.37 | | 83.51 | 76.17 | 63.64 | 62.75 |
| Tester average | 38.78 | 30.05 | 56.57 | 56.40 | 252.56 | | 236.22 | | 87.90 | 73.38 | 64.41 | 57.08 |
| **Lsd0.05** | 3.67 | 4.85 | 0.416 | 4.33 | **31.91** | | 31.98 | | 9.57 | 10.00 | **16.48** | 16.96 |
|  | **LL** |  | **LW** |  | **ASH** | |  | | **CPR** |  | **CFB** |  |
|  | **Line** |  |  |  |  | |  | |  |  |  |  |
| CL 348 | 7.97 | 6.60 | 6.73 | 7.05 | 7.46 | | 8.03 | | 20.45 | 20.74 | 21.64 | 23.84 |
| CL 321-1 | 8.14 | 6.67 | 6.37 | 6.90 | 7.90 | | 7.76 | | 19.84 | 21.89 | 22.12 | 23.77 |
| N 311 | 6.61 | 6.74 | 6.64 | 6.42 | 7.53 | | 7.45 | | 19.65 | 21.36 | 21.76 | 24.21 |
| IFC 9304 | 6.74 | 6.95 | 6.56 | 6.53 | 7.67 | | 7.38 | | 19.63 | 21.13 | 21.13 | 24.24 |
| IFC 9402 | 8.52 | 6.87 | 6.45 | 6.41 | 7.95 | | 7.27 | | 19.57 | 20.53 | 20.53 | 23.07 |
| CS 98 | 6.95 | 7.03 | 5.78 | 7.38 | 8.07 | | 7.01 | | 19.39 | 21.07 | 21.07 | 23.73 |
| FD 711 | 8.01 | 6.72 | 5.70 | 6.83 | 8.29 | | 6.66 | | 19.91 | 23.21 | 23.21 | 24.23 |
| FD 719 | 7.84 | 6.47 | 6.81 | 7.55 | 7.74 | | 6.96 | | 20.15 | 22.67 | 22.66 | 24.00 |
| FD 1052 | 6.27 | 6.47 | 7.28 | 7.28 | 7.92 | | 6.73 | | 20.14 | 23.36 | 23.36 | 24.69 |
| FD 1067 | 7.43 | 6.52 | 6.84 | 6.78 | 8.26 | | 7.03 | | 20.26 | 22.93 | 22.93 | 24.29 |
| FD 1259 | 7.73 | 6.48 | 6.36 | 7.18 | 8.12 | | 7.17 | | 20.11 | 22.95 | 22.95 | 23.31 |
| EC 467380 | 6.22 | 7.04 | 6.25 | 6.63 | 6.34 | | 6.66 | | 20.80 | 22.93 | 23.73 | 23.10 |
| EC 240806 | 8.29 | 7.12 | 6.17 | 6.96 | 7.72 | | 6.96 | | 20.92 | 23.87 | 24.95 | 24.27 |
| K – 13 -CP42 | 7.90 | 7.06 | 6.14 | 7.61 | 6.93 | | 7.06 | | 21.34 | 23.12 | 24.91 | 22.47 |
| GETC 6 | 6.37 | 7.07 | 5.68 | 7.68 | 7.81 | | 7.40 | | 21.08 | 22.79 | 24.02 | 23.50 |
| GETC10 | 6.56 | 7.14 | 6.38 | 7.03 | 6.90 | | 7.70 | | 21.39 | 23.42 | 24.87 | 23.91 |
| GETC 15 | 8.48 | 6.85 | 6.62 | 7.93 | 6.93 | | 7.98 | | 21.20 | 22.72 | 25.34 | 23.56 |
| GETC 18 | 7.06 | 7.31 | 6.43 | 8.21 | 7.36 | | 8.00 | | 21.73 | 23.20 | 24.38 | 23.17 |
| GETC 21 | 6.20 | 7.19 | 6.15 | 7.28 | 6.81 | | 7.57 | | 21.09 | 22.40 | 23.90 | 23.42 |
| GETC 23 | 6.61 | 7.11 | 6.57 | 7.95 | 7.41 | | 7.04 | | 21.60 | 22.63 | 23.88 | 22.87 |
| GETC 40 | 7.46 | 7.24 | 6.94 | 7.83 | 7.54 | | 7.48 | | 21.93 | 23.19 | 24.05 | 23.19 |
| GETC 41 | 6.43 | 6.70 | 6.77 | 8.00 | 7.48 | | 7.92 | | 22.03 | 23.42 | 24.45 | 23.64 |
| GETC 49 | 7.27 | 8.00 | 6.19 | 6.80 | 8.50 | | 8.05 | | 22.08 | 23.22 | 24.47 | 21.29 |
| Line average | 7.26 | 6.93 | 6.43 | 7.23 | 7.59 | | 7.36 | | 20.71 | 22.55 | 23.32 | 23.56 |
|  | **Teste** |  |  |  |  | |  | |  |  |  |  |
| CO(FC) 8 | 7.24 | 9.24 | 6.42 | 6.86 | 8.97 | | 8.80 | | 22.14 | 23.11 | 24.21 | 24.67 |
| CO 9 | 6.78 | 9.11 | 7.28 | 6.33 | 8.67 | | 8.67 | | 20.05 | 22.97 | 23.35 | 26.46 |
| TNFC0926 | 8.41 | 8.41 | 7.94 | 6.98 | 8.41 | | 8.41 | | 21.22 | 22.55 | 22.47 | 24.69 |
| Tester average | 7.48 | 8.92 | 7.21 | 6.72 | 8.68 | | 8.62 | | 21.14 | 22.88 | 23.35 | 25.27 |
| **Lsd0.05** | **0.57** | 0.82 | 0.749 | 1.36 | 1.07 | | 0.61 | | **1.08.** | 1.02 | **1.22** | 1.51 |
|  | **CFT** |  | **NPB** |  | **LSR** |  | |
|  |  |  |  |  |  |  | |
| CL 348 | 2.45 | 1.82 | 3.73 | 5.80 | 0.63 | 0.63 | |
| CL 321-1 | 2.38 | 1.97 | 4.33 | 6.14 | 0.72 | 0.73 | |
| N 311 | 2.75 | 1.97 | 3.89 | 5.60 | 0.68 | 0.63 | |
| IFC 9304 | 2.88 | 2.00 | 3.47 | 5.33 | 0.68 | 0.75 | |
| IFC 9402 | 3.18 | 1.75 | 4.17 | 5.60 | 0.71 | 0.75 | |
| CS 98 | 2.49 | 1.75 | 3.66 | 6.10 | 0.57 | 0.76 | |
| FD 711 | 2.65 | 1.80 | 3.98 | 5.67 | 0.71 | 0.80 | |
| FD 719 | 2.36 | 1.91 | 4.22 | 6.18 | 0.78 | 0.72 | |
| FD 1052 | 2.38 | 1.91 | 3.96 | 6.47 | 0.74 | 0.75 | |
| FD 1067 | 2.38 | 1.89 | 3.54 | 5.68 | 0.56 | 0.78 | |
| FD 1259 | 2.56 | 1.92 | 4.03 | 5.88 | 0.65 | 0.74 | |
| EC 467380 | 2.41 | 1.92 | 3.68 | 5.57 | 0.52 | 0.67 | |
| EC 240806 | 2.32 | 1.89 | 4.32 | 5.64 | 0.61 | 0.66 | |
| K – 13 -CP42 | 2.08 | 1.79 | 4.10 | 6.28 | 0.82 | 0.74 | |
| GETC 6 | 2.76 | 2.01 | 3.38 | 5.94 | 0.62 | 0.68 | |
| GETC10 | 2.61 | 2.09 | 3.76 | 5.98 | 0.62 | 0.79 | |
| GETC 15 | 2.20 | 2.25 | 4.02 | 7.11 | 0.67 | 0.66 | |
| GETC 18 | 2.82 | 2.67 | 4.02 | 6.47 | 0.64 | 0.66 | |
| GETC 21 | 2.85 | 2.67 | 3.82 | 6.15 | 0.69 | 0.71 | |
| GETC 23 | 2.96 | 2.74 | 4.24 | 6.53 | 0.59 | 0.67 | |
| GETC 40 | 2.35 | 2.34 | 4.03 | 6.20 | 0.75 | 0.69 | |
| GETC 41 | 2.50 | 2.36 | 4.67 | 6.36 | 0.69 | 0.75 | |
| GETC 49 | 2.23 | 2.18 | 4.53 | 5.85 | 0.67 | 0.82 | |
| Line average | 2.55 | 2.07 | 3.98 | 6.02 | 0.63 | 0.72 | |
|  |  |  |  |  |  |  | |
| CO(FC) 8 | 1.82 | 2.40 | 4.59 | 5.90 | 0.67 | 0.68 | |
| CO 9 | 1.97 | 2.78 | 4.18 | 5.42 | 0.61 | 0.65 | |
| TNFC0926 | 1.97 | 2.41 | 4.03 | 6.56 | 0.75 | 0.69 | |
| Tester average | 2.00 | 2.53 | 4.27 | 5.96 | 0.68 | 0.68 | |
| **Lsd0.05** | **0.91** | **0.65** | **0.39** | 0.49 | **0.13** | **0.16.** | |

NPB-Number of primary branches per plant, PH-Plant height (cm), NOL-Number of leaves per plant, CFB-Crude fiber content (%), CFT-Crude fat content (%), DMY-Dry matter yield per plant (g), DFF-Days to 50% flowering, CPR-Crude protein content (%), GFY-Green fodder yield per plant (g), LSR- Leaf stem ratio, LL- Leaf length(cm), and LW- Leaf width(cm).

**Table 4**: Mean Performance of Sixty-nine Line × Tester Hybrids of Cowpea for Fodder Yield and Fodder Quality Traits Over Two Years

| Genotypes | DMY |  | DFF |  | GFY |  | PH |  | NOL |  | LL |  | LW |  | ASH |  | CPR |  | CFB |  | CFT |  | NPB |  | LSR |  |
| --- | --- | --- | --- | --- | --- | --- | --- | --- | --- | --- | --- | --- | --- | --- | --- | --- | --- | --- | --- | --- | --- | --- | --- | --- | --- | --- |
|  | Y1 | Y2 | Y1 | Y2 | Y1 | Y2 | Y1 | Y2 | Y1 | Y2 | Y1 | Y2 | Y1 | Y2 | Y1 | Y2 | Y1 | Y2 | Y1 | Y2 | Y1 | Y2 | Y1 | Y2 | Y1 | Y2 |
| CL 348 x CO(FC) 8 | 43.6 | 57.34 | 46.1 | 49.0 | 268.1 | 331.1 | 89.6 | 64.9 | 50.1 | 66.7 | 9.5 | 7.7 | 7.6 | 7.5 | 8.7 | 8.5 | 17.2 | 16.2 | 24.3 | 18.2 | 3.79 | 3.6 | 3.67 | 3.2 | 0.66 | 0.65 |
| CL 348 x CO 9 | 43.4 | 63.34 | 47.6 | 53.2 | 276.8 | 339.0 | 98.6 | 87.2 | 49.0 | 60.6 | 8.8 | 9.4 | 6.7 | 7.4 | 8.6 | 8.5 | 17.2 | 16.4 | 25.5 | 18.3 | 3.61 | 3.6 | 3.69 | 2.81 | 0.53 | 0.65 |
| CL 348 x TNFC0926 | 50.0 | 63.32 | 48.4 | 52.6 | 290.5 | 346.5 | 99.0 | 55.1 | 41.9 | 59.3 | 9.8 | 6.7 | 6.6 | 6.8 | 8.7 | 8.6 | 17.5 | 15.5 | 25.0 | 19.3 | 3.54 | 3.5 | 3.57 | 4.81 | 0.67 | 0.66 |
| CL 321-1 x CO(FC) 8 | 52.0 | 66.99 | 47.0 | 53.6 | 288.8 | 337.6 | 91.7 | 39.2 | 43.4 | 68.6 | 10.2 | 9.3 | 7.1 | 6.7 | 8.6 | 8.4 | 17.2 | 16.5 | 24.8 | 19.2 | 3.71 | 3.4 | 3.79 | 2.94 | 0.78 | 0.68 |
| CL 321-1 x CO 9 | 40.5 | 57.80 | 48.5 | 57.6 | 308.7 | 339.2 | 87.9 | 35.8 | 42.1 | 76.4 | 10.3 | 7.9 | 7.3 | 7.0 | 8.6 | 8.4 | 17.0 | 17.7 | 23.8 | 19.5 | 3.60 | 3.4 | 3.73 | 2.96 | 0.55 | 0.67 |
| CL 321-1 x TNFC0926 | 35.4 | 48.91 | 49.2 | 56.6 | 293.7 | 315.5 | 94.4 | 40.1 | 51.1 | 60.2 | 10.3 | 7.7 | 6.6 | 6.6 | 8.4 | 8.8 | 17.2 | 17.2 | 23.8 | 17.9 | 3.76 | 3.5 | 3.76 | 2.96 | 0.68 | 0.68 |
| N 311 x CO(FC) 8 | 40.7 | 58.47 | 47.7 | 46.9 | 298.0 | 353.6 | 94.4 | 80.4 | 51.5 | 70.2 | 8.5 | 10.0 | 7.2 | 6.2 | 8.3 | 8.5 | 17.3 | 17.6 | 23.6 | 18.2 | 3.72 | 3.4 | 3.48 | 3.09 | 0.56 | 0.70 |
| N 311 x CO 9 | 39.7 | 65.43 | 49.3 | 57.1 | 289.0 | 326.7 | 84.3 | 76.5 | 37.0 | 58.6 | 8.0 | 10.5 | 7.2 | 6.1 | 8.3 | 8.3 | 17.3 | 19.3 | 21.0 | 18.1 | 3.58 | 3.7 | 3.40 | 3.10 | 0.72 | 0.66 |
| N 311 x TNFC0926 | 51.4 | 67.47 | 50.0 | 50.9 | 305.3 | 316.7 | 90.6 | 70.6 | 41.0 | 64.6 | 8.1 | 7.5 | 6.6 | 6.4 | 8.8 | 8.8 | 17.5 | 17.6 | 17.6 | 17.8 | 3.43 | 3.7 | 3.61 | 4.12 | 0.75 | 0.72 |
| IFC 9304 x CO(FC) 8 | 51.0 | 66.68 | 48.7 | 56.8 | 301.3 | 317.6 | 95.1 | 66.1 | 46.3 | 62.8 | 9.7 | 9.0 | 7.1 | 6.6 | 8.4 | 8.6 | 17.4 | 17.9 | 17.9 | 17.5 | 3.34 | 3.5 | 3.29 | 3.23 | 0.55 | 0.66 |
| IFC 9304 x CO 9 | 54.0 | 61.96 | 50.0 | 52.2 | 285.3 | 343.5 | 98.0 | 78.5 | 51.2 | 70.5 | 8.7 | 6.9 | 6.6 | 6.9 | 8.5 | 8.1 | 17.9 | 16.6 | 16.6 | 17.5 | 3.50 | 3.4 | 3.40 | 3.25 | 0.73 | 0.68 |
| IFC 9304 x TNFC0926 | 47.3 | 47.93 | 50.8 | 53.6 | 281.3 | 337.1 | 94.3 | 89.2 | 53.0 | 70.4 | 7.8 | 9.3 | 7.2 | 7.0 | 8.2 | 8.7 | 17.6 | 17.9 | 17.9 | 17.7 | 3.62 | 3.0 | 3.39 | 4.27 | 0.48 | 0.67 |
| IFC 9402 x CO(FC) 8 | 40.0 | 60.81 | 49.5 | 51.4 | 317.3 | 338.2 | 90.7 | 84.3 | 55.6 | 51.1 | 8.8 | 8.5 | 7.9 | 6.5 | 8.5 | 8.4 | 17.4 | 18.0 | 18.0 | 18.1 | 4.10 | 3.5 | 3.81 | 3.37 | 0.73 | 0.66 |
| IFC 9402 x CO 9 | 46.7 | 58.79 | 50.8 | 50.5 | 324.7 | 347.8 | 92.5 | 70.3 | 48.0 | 63.1 | 8.8 | 7.3 | 7.6 | 6.5 | 8.3 | 8.5 | 18.1 | 17.6 | 17.6 | 18.1 | 3.55 | 3.3 | 3.48 | 3.40 | 0.83 | 0.70 |
| IFC 9402 x TNFC0926 | 53.3 | 60.09 | 51.5 | 54.1 | 296.0 | 360.4 | 98.8 | 68.2 | 58.0 | 63.0 | 10.2 | 9.5 | 7.0 | 6.4 | 8.0 | 8.6 | 17.7 | 19.1 | 19.1 | 17.8 | 3.86 | 3.2 | 3.60 | 3.43 | 0.83 | 0.66 |
| CS 98 x CO(FC) 8 | 37.9 | 55.07 | 50.3 | 56.0 | 315.2 | 330.0 | 93.9 | 82.3 | 47.0 | 50.8 | 9.0 | 9.9 | 8.0 | 6.3 | 8.7 | 7.6 | 18.1 | 17.9 | 17.9 | 17.7 | 3.83 | 3.6 | 3.69 | 3.51 | 0.68 | 0.69 |
| CS 98 x CO 9 | 53.4 | 67.00 | 51.7 | 54.2 | 347.3 | 323.4 | 90.0 | 74.9 | 62.5 | 64.4 | 9.6 | 6.7 | 7.7 | 6.8 | 7.9 | 7.6 | 18.3 | 17.4 | 17.4 | 18.3 | 3.55 | 3.3 | 3.53 | 3.55 | 0.66 | 0.67 |
| CS 98 x TNFC0926 | 36.0 | 67.49 | 52.4 | 51.4 | 349.0 | 344.0 | 88.0 | 58.9 | 58.4 | 56.8 | 8.8 | 6.6 | 7.3 | 6.6 | 8.3 | 8.1 | 18.2 | 16.0 | 16.0 | 18.0 | 4.06 | 3.5 | 3.78 | 3.58 | 0.73 | 0.67 |

| Genotypes | DMY |  | DFF |  | GFY |  | PH |  | NOL |  | LL |  | LW |  | ASH |  | CPR |  | CFB |  | CFT |  | NPB |  | LSR |  |
| --- | --- | --- | --- | --- | --- | --- | --- | --- | --- | --- | --- | --- | --- | --- | --- | --- | --- | --- | --- | --- | --- | --- | --- | --- | --- | --- |
|  | Y1 | Y2 | Y1 | Y2 | Y1 | Y2 | Y1 | Y2 | Y1 | Y2 | Y1 | Y2 | Y1 | Y2 | Y1 | Y2 | Y1 | Y2 | Y1 | Y2 | Y1 | Y2 | Y1 | Y2 | Y1 | Y2 |
| FD 711 x CO(FC) 8 | 52.2 | 54.29 | 51.3 | 55.2 | 343.2 | 366.9 | 90.0 | 73.0 | 57.5 | 61.9 | 8.0 | 8.9 | 8.3 | 6.2 | 8.3 | 8.7 | 18.5 | 15.6 | 15.6 | 17.6 | 3.98 | 3.2 | 3.83 | 3.66 | 0.73 | 0.67 |
| FD 711 x CO 9 | 52.3 | 59.46 | 52.7 | 56.3 | 331.2 | 319.2 | 88.8 | 65.1 | 51.3 | 53.5 | 9.4 | 8.5 | 8.2 | 6.3 | 8.4 | 8.8 | 18.6 | 16.1 | 16.1 | 19.6 | 3.92 | 3.6 | 3.82 | 3.70 | 0.64 | 0.65 |
| FD 711 x TNFC0926 | 39.6 | 53.37 | 53.4 | 55.6 | 326.0 | 357.8 | 93.1 | 50.8 | 56.9 | 69.4 | 9.0 | 9.7 | 7.6 | 6.6 | 8.1 | 8.9 | 18.2 | 16.8 | 16.8 | 16.8 | 4.31 | 2.4 | 3.98 | 2.74 | 0.60 | 0.66 |
| FD 719 x CO(FC) 8 | 48.5 | 61.17 | 51.9 | 51.5 | 323.7 | 353.0 | 93.7 | 69.8 | 59.9 | 64.2 | 8.5 | 10.4 | 6.8 | 6.2 | 8.1 | 8.8 | 18.7 | 17.1 | 17.1 | 16.4 | 3.91 | 3.3 | 3.84 | 3.80 | 0.58 | 0.65 |
| FD 719 x CO 9 | 45.9 | 48.08 | 53.4 | 55.1 | 341.6 | 326.1 | 90.3 | 73.3 | 69.3 | 71.1 | 8.1 | 8.3 | 6.5 | 6.8 | 8.1 | 8.5 | 18.8 | 16.9 | 16.9 | 19.8 | 4.10 | 3.3 | 3.97 | 3.84 | 0.69 | 0.67 |
| FD 719 x TNFC0926 | 36.5 | 57.23 | 54.2 | 54.8 | 344.9 | 337.7 | 86.2 | 65.4 | 65.2 | 54.6 | 7.9 | 8.7 | 6.5 | 6.9 | 8.5 | 8.3 | 18.9 | 17.1 | 17.1 | 23.0 | 3.91 | 3.0 | 3.79 | 3.89 | 0.60 | 0.69 |
| FD 1052 x CO(FC) 8 | 38.4 | 62.78 | 52.8 | 54.3 | 344.3 | 330.1 | 88.5 | 48.1 | 74.9 | 72.4 | 9.0 | 8.9 | 7.5 | 6.5 | 8.7 | 8.4 | 18.6 | 17.2 | 17.2 | 21.7 | 4.37 | 3.0 | 4.18 | 3.94 | 0.70 | 0.67 |
| FD 1052 x CO 9 | 45.0 | 58.13 | 54.2 | 55.3 | 329.3 | 253.6 | 87.6 | 81.5 | 60.0 | 64.5 | 9.2 | 8.5 | 7.9 | 6.8 | 8.1 | 8.0 | 18.9 | 19.6 | 19.6 | 22.3 | 4.63 | 3.5 | 4.36 | 3.99 | 0.62 | 0.60 |
| FD 1052 x TNFC0926 | 45.1 | 54.29 | 54.9 | 53.9 | 343.6 | 303.6 | 85.6 | 78.2 | 63.8 | 58.2 | 10.0 | 10.4 | 7.6 | 5.9 | 8.1 | 8.4 | 18.6 | 18.8 | 18.8 | 22.2 | 4.09 | 3.1 | 3.95 | 4.04 | 0.60 | 0.57 |
| FD 1067 x CO(FC) 8 | 67.0 | 58.99 | 53.8 | 56.9 | 351.6 | 304.9 | 93.7 | 83.4 | 55.6 | 61.2 | 9.4 | 9.3 | 7.7 | 6.0 | 8.3 | 8.4 | 18.8 | 19.1 | 19.1 | 22.4 | 4.38 | 3.4 | 4.23 | 4.08 | 0.55 | 0.57 |
| FD 1067 x CO 9 | 54.0 | 62.33 | 55.1 | 57.0 | 335.3 | 226.3 | 95.6 | 98.4 | 58.5 | 59.5 | 9.1 | 7.1 | 6.8 | 6.2 | 8.8 | 8.9 | 18.9 | 19.9 | 19.9 | 22.0 | 4.04 | 3.2 | 4.04 | 4.14 | 0.74 | 0.59 |
| FD 1067 x TNFC0926 | 59.0 | 58.25 | 55.8 | 56.1 | 327.3 | 302.2 | 96.2 | 87.4 | 67.1 | 71.8 | 8.7 | 8.5 | 6.9 | 6.8 | 8.7 | 8.8 | 18.6 | 19.4 | 19.4 | 21.6 | 4.22 | 3.2 | 4.09 | 4.20 | 0.72 | 0.58 |
| FD 1259 x CO(FC) 8 | 55.9 | 56.20 | 54.6 | 58.2 | 327.0 | 267.7 | 85.5 | 50.1 | 54.4 | 55.9 | 9.4 | 10.5 | 7.3 | 6.0 | 8.2 | 8.5 | 18.9 | 19.0 | 19.0 | 21.4 | 3.64 | 2.8 | 3.81 | 4.23 | 0.78 | 0.62 |
| FD 1259 x CO 9 | 67.6 | 50.59 | 55.9 | 57.1 | 329.8 | 292.5 | 77.7 | 68.1 | 54.9 | 61.0 | 9.3 | 7.3 | 8.2 | 6.2 | 8.8 | 8.2 | 18.6 | 19.1 | 19.1 | 21.3 | 3.85 | 3.0 | 3.97 | 4.29 | 0.76 | 0.69 |
| FD 1259 x TNFC0926 | 65.3 | 59.37 | 56.8 | 58.2 | 336.5 | 266.8 | 82.0 | 83.5 | 59.9 | 61.7 | 9.4 | 9.3 | 7.7 | 6.6 | 8.5 | 8.7 | 19.2 | 19.2 | 19.2 | 21.6 | 3.52 | 3.2 | 3.70 | 4.35 | 0.60 | 0.62 |
| EC 467380 x CO(FC) 8 | 62.3 | 46.03 | 55.2 | 53.6 | 336.9 | 263.6 | 88.2 | 64.7 | 71.9 | 71.1 | 8.9 | 9.2 | 7.0 | 6.5 | 8.5 | 8.4 | 19.0 | 19.7 | 19.7 | 21.7 | 3.53 | 3.3 | 3.79 | 4.36 | 0.59 | 0.63 |
| EC 467380 x CO 9 | 48.4 | 53.99 | 56.8 | 57.5 | 332.5 | 265.7 | 80.6 | 54.8 | 63.5 | 60.2 | 9.9 | 9.4 | 7.5 | 5.9 | 8.3 | 8.4 | 19.2 | 19.3 | 19.3 | 21.7 | 2.78 | 3.0 | 3.35 | 4.44 | 0.53 | 0.63 |
| EC 467380 x TNFC0926 | 49.4 | 56.16 | 57.5 | 55.7 | 338.4 | 278.5 | 80.6 | 75.7 | 58.5 | 65.6 | 9.3 | 8.9 | 7.2 | 6.2 | 8.7 | 8.1 | 19.3 | 19.4 | 19.4 | 22.1 | 2.91 | 2.8 | 3.37 | 4.50 | 0.54 | 0.63 |

Table 4 (continued)

Table 4 (continued)

| Genotypes | DMY |  | DFF |  | GFY |  | PH |  | NOL |  | LL |  | LW |  | ASH |  | CPR |  | CFB |  | CFT |  | NPB |  | LSR |  |
| --- | --- | --- | --- | --- | --- | --- | --- | --- | --- | --- | --- | --- | --- | --- | --- | --- | --- | --- | --- | --- | --- | --- | --- | --- | --- | --- |
|  | Y1 | Y2 | Y1 | Y2 | Y1 | Y2 | Y1 | Y2 | Y1 | Y2 | Y1 | Y2 | Y1 | Y2 | Y1 | Y2 | Y1 | Y2 | Y1 | Y2 | Y1 | Y2 | Y1 | Y2 | Y1 | Y2 |
| EC 240806 x CO(FC) 8 | 52.8 | 53.19 | 56.2 | 56.0 | 331.0 | 270.6 | 83.4 | 60.2 | 62.0 | 48.5 | 8.8 | 7.5 | 7.1 | 6.4 | 8.8 | 8.9 | 18.8 | 19.6 | 19.6 | 21.9 | 2.83 | 2.6 | 3.41 | 4.51 | 0.61 | 0.64 |
| EC 240806 x CO 9 | 56.7 | 66.60 | 57.7 | 60.1 | 329.0 | 280.6 | 82.2 | 67.6 | 63.7 | 49.5 | 8.4 | 8.5 | 7.1 | 6.9 | 8.9 | 8.5 | 18.9 | 19.6 | 19.6 | 22.4 | 4.23 | 2.9 | 4.31 | 4.58 | 0.73 | 0.61 |
| EC 240806 x TNFC0926 | 63.2 | 48.43 | 58.3 | 57.4 | 332.6 | 287.0 | 89.6 | 79.2 | 54.6 | 62.9 | 8.9 | 9.1 | 7.2 | 6.4 | 8.4 | 8.7 | 18.6 | 19.4 | 19.4 | 22.6 | 2.59 | 3.0 | 3.22 | 4.66 | 0.70 | 0.72 |
| K – 13 -CP42 x CO(FC) 8 | 67.8 | 53.21 | 57.0 | 55.8 | 335.6 | 289.4 | 95.2 | 57.6 | 56.2 | 62.4 | 8.7 | 9.4 | 6.9 | 6.4 | 8.7 | 8.8 | 18.9 | 19.4 | 19.4 | 20.8 | 3.34 | 3.2 | 3.77 | 4.65 | 0.53 | 0.60 |
| K – 13 -CP42 x CO 9 | 45.0 | 58.48 | 58.3 | 56.3 | 288.7 | 286.3 | 89.1 | 78.1 | 66.6 | 47.6 | 8.5 | 10.4 | 8.1 | 6.9 | 8.6 | 8.6 | 18.6 | 19.4 | 19.4 | 21.1 | 3.61 | 3.0 | 3.97 | 4.73 | 0.58 | 0.67 |
| K – 13 -CP42 x TNFC0926 | 52.0 | 66.55 | 59.2 | 57.6 | 282.9 | 278.0 | 88.0 | 63.3 | 61.2 | 52.3 | 8.3 | 10.4 | 7.7 | 6.4 | 8.4 | 8.3 | 19.2 | 19.7 | 19.7 | 20.3 | 3.27 | 3.1 | 3.71 | 4.81 | 0.72 | 0.60 |
| GETC 6 x CO(FC) 8 | 48.7 | 48.43 | 57.9 | 57.9 | 273.5 | 277.4 | 94.4 | 60.8 | 74.9 | 36.8 | 8.5 | 10.1 | 7.7 | 6.1 | 8.3 | 8.4 | 19.0 | 19.6 | 19.6 | 19.7 | 3.29 | 3.1 | 3.79 | 4.79 | 0.66 | 0.66 |
| GETC 6 x CO 9 | 46.8 | 66.86 | 59.3 | 59.8 | 286.2 | 272.3 | 91.4 | 72.1 | 59.8 | 40.8 | 8.1 | 10.6 | 7.4 | 6.0 | 8.8 | 8.4 | 19.2 | 20.0 | 20.0 | 20.5 | 3.40 | 3.2 | 3.89 | 4.88 | 0.56 | 0.72 |
| GETC 6 x TNFC0926 | 62.7 | 46.77 | 60.0 | 58.0 | 272.5 | 269.0 | 92.8 | 52.8 | 67.8 | 44.8 | 8.6 | 7.6 | 7.5 | 6.2 | 8.1 | 8.2 | 19.3 | 18.9 | 18.9 | 20.1 | 3.54 | 2.9 | 3.93 | 4.97 | 0.86 | 0.67 |
| GETC10 x CO(FC) 8 | 64.9 | 60.95 | 58.9 | 61.8 | 278.2 | 269.7 | 96.5 | 62.2 | 65.2 | 37.5 | 8.8 | 8.9 | 7.4 | 6.5 | 8.5 | 8.9 | 18.9 | 19.2 | 19.2 | 19.9 | 3.34 | 2.5 | 3.87 | 4.93 | 0.78 | 0.64 |
| GETC10 x CO 9 | 61.1 | 52.92 | 60.2 | 61.1 | 269.2 | 261.5 | 90.3 | 84.8 | 66.1 | 42.8 | 7.9 | 8.8 | 7.8 | 6.5 | 8.3 | 8.3 | 19.4 | 19.7 | 19.7 | 20.6 | 3.14 | 2.3 | 3.78 | 5.03 | 0.68 | 0.60 |
| GETC10 x TNFC0926 | 69.0 | 46.69 | 60.9 | 59.2 | 285.5 | 267.5 | 91.9 | 70.0 | 58.8 | 38.8 | 8.1 | 9.0 | 7.1 | 6.2 | 8.4 | 7.9 | 19.1 | 19.1 | 19.1 | 20.4 | 3.33 | 2.0 | 3.85 | 5.12 | 0.63 | 0.65 |
| GETC 15 x CO(FC) 8 | 51.4 | 55.88 | 59.6 | 59.4 | 281.5 | 250.5 | 81.7 | 76.3 | 66.4 | 30.9 | 8.0 | 10.0 | 7.3 | 6.7 | 8.5 | 8.0 | 19.3 | 20.1 | 20.1 | 19.5 | 2.65 | 1.8 | 3.49 | 5.08 | 0.66 | 0.63 |
| GETC 15 x CO 9 | 63.3 | 60.09 | 61.1 | 62.3 | 265.5 | 246.7 | 83.5 | 69.9 | 56.7 | 44.0 | 8.1 | 8.2 | 6.7 | 7.9 | 8.6 | 8.0 | 18.8 | 20.0 | 20.0 | 19.0 | 3.25 | 2.1 | 3.90 | 5.18 | 0.62 | 0.61 |
| GETC 15 x TNFC0926 | 30.1 | 65.90 | 61.7 | 59.5 | 261.5 | 215.9 | 86.7 | 66.9 | 68.9 | 43.2 | 8.6 | 6.9 | 6.8 | 7.1 | 8.1 | 8.5 | 18.9 | 21.6 | 21.6 | 19.2 | 3.47 | 2.1 | 3.99 | 5.28 | 0.78 | 0.60 |
| GETC 18 x CO(FC) 8 | 34.3 | 68.82 | 60.5 | 61.8 | 290.9 | 207.3 | 93.9 | 61.5 | 73.8 | 57.9 | 8.3 | 8.5 | 7.3 | 6.5 | 8.4 | 8.5 | 18.6 | 21.4 | 21.4 | 19.8 | 3.35 | 2.2 | 3.97 | 5.22 | 0.68 | 0.64 |
| GETC 18 x CO 9 | 35.9 | 63.56 | 61.8 | 61.6 | 297.5 | 204.6 | 95.8 | 88.0 | 58.0 | 49.0 | 8.7 | 7.5 | 6.6 | 5.8 | 8.4 | 8.3 | 18.9 | 21.4 | 21.4 | 19.9 | 2.83 | 1.7 | 3.69 | 5.32 | 0.54 | 0.63 |
| GETC 18 x TNFC0926 | 30.4 | 68.87 | 62.6 | 60.6 | 274.2 | 219.9 | 92.5 | 60.7 | 63.5 | 54.8 | 8.2 | 10.2 | 7.0 | 6.5 | 8.4 | 8.6 | 18.6 | 21.1 | 21.1 | 20.2 | 3.62 | 2.4 | 4.13 | 5.43 | 0.67 | 0.60 |

Table 4 (continued)

| Genotypes | DMY |  | DFF |  | GFY |  | PH |  | NOL |  | LL |  | LW |  | ASH |  | CPR |  | CFB |  | CFT |  | NPB |  | LSR |  |
| --- | --- | --- | --- | --- | --- | --- | --- | --- | --- | --- | --- | --- | --- | --- | --- | --- | --- | --- | --- | --- | --- | --- | --- | --- | --- | --- |
|  | Y1 | Y2 | Y1 | Y2 | Y1 | Y2 | Y1 | Y2 | Y1 | Y2 | Y1 | Y2 | Y1 | Y2 | Y1 | Y2 | Y1 | Y2 | Y1 | Y2 | Y1 | Y2 | Y1 | Y2 | Y1 | Y2 |
| EC 240806 x CO(FC) 8 | 52.8 | 53.19 | 56.2 | 56.0 | 331.0 | 270.6 | 83.4 | 60.2 | 62.0 | 48.5 | 8.8 | 7.5 | 7.1 | 6.4 | 8.8 | 8.9 | 18.8 | 19.6 | 19.6 | 21.9 | 2.83 | 2.6 | 3.41 | 4.51 | 0.61 | 0.64 |
| EC 240806 x CO 9 | 56.7 | 66.60 | 57.7 | 60.1 | 329.0 | 280.6 | 82.2 | 67.6 | 63.7 | 49.5 | 8.4 | 8.5 | 7.1 | 6.9 | 8.9 | 8.5 | 18.9 | 19.6 | 19.6 | 22.4 | 4.23 | 2.9 | 4.31 | 4.58 | 0.73 | 0.61 |
| EC 240806 x TNFC0926 | 63.2 | 48.43 | 58.3 | 57.4 | 332.6 | 287.0 | 89.6 | 79.2 | 54.6 | 62.9 | 8.9 | 9.1 | 7.2 | 6.4 | 8.4 | 8.7 | 18.6 | 19.4 | 19.4 | 22.6 | 2.59 | 3.0 | 3.22 | 4.66 | 0.70 | 0.72 |
| K – 13 -CP42 x CO(FC) 8 | 67.8 | 53.21 | 57.0 | 55.8 | 335.6 | 289.4 | 95.2 | 57.6 | 56.2 | 62.4 | 8.7 | 9.4 | 6.9 | 6.4 | 8.7 | 8.8 | 18.9 | 19.4 | 19.4 | 20.8 | 3.34 | 3.2 | 3.77 | 4.65 | 0.53 | 0.60 |
| K – 13 -CP42 x CO 9 | 45.0 | 58.48 | 58.3 | 56.3 | 288.7 | 286.3 | 89.1 | 78.1 | 66.6 | 47.6 | 8.5 | 10.4 | 8.1 | 6.9 | 8.6 | 8.6 | 18.6 | 19.4 | 19.4 | 21.1 | 3.61 | 3.0 | 3.97 | 4.73 | 0.58 | 0.67 |
| K – 13 -CP42 x TNFC0926 | 52.0 | 66.55 | 59.2 | 57.6 | 282.9 | 278.0 | 88.0 | 63.3 | 61.2 | 52.3 | 8.3 | 10.4 | 7.7 | 6.4 | 8.4 | 8.3 | 19.2 | 19.7 | 19.7 | 20.3 | 3.27 | 3.1 | 3.71 | 4.81 | 0.72 | 0.60 |
| GETC 6 x CO(FC) 8 | 48.7 | 48.43 | 57.9 | 57.9 | 273.5 | 277.4 | 94.4 | 60.8 | 74.9 | 36.8 | 8.5 | 10.1 | 7.7 | 6.1 | 8.3 | 8.4 | 19.0 | 19.6 | 19.6 | 19.7 | 3.29 | 3.1 | 3.79 | 4.79 | 0.66 | 0.66 |
| GETC 6 x CO 9 | 46.8 | 66.86 | 59.3 | 59.8 | 286.2 | 272.3 | 91.4 | 72.1 | 59.8 | 40.8 | 8.1 | 10.6 | 7.4 | 6.0 | 8.8 | 8.4 | 19.2 | 20.0 | 20.0 | 20.5 | 3.40 | 3.2 | 3.89 | 4.88 | 0.56 | 0.72 |
| GETC 6 x TNFC0926 | 62.7 | 46.77 | 60.0 | 58.0 | 272.5 | 269.0 | 92.8 | 52.8 | 67.8 | 44.8 | 8.6 | 7.6 | 7.5 | 6.2 | 8.1 | 8.2 | 19.3 | 18.9 | 18.9 | 20.1 | 3.54 | 2.9 | 3.93 | 4.97 | 0.86 | 0.67 |
| GETC10 x CO(FC) 8 | 64.9 | 60.95 | 58.9 | 61.8 | 278.2 | 269.7 | 96.5 | 62.2 | 65.2 | 37.5 | 8.8 | 8.9 | 7.4 | 6.5 | 8.5 | 8.9 | 18.9 | 19.2 | 19.2 | 19.9 | 3.34 | 2.5 | 3.87 | 4.93 | 0.78 | 0.64 |
| GETC10 x CO 9 | 61.1 | 52.92 | 60.2 | 61.1 | 269.2 | 261.5 | 90.3 | 84.8 | 66.1 | 42.8 | 7.9 | 8.8 | 7.8 | 6.5 | 8.3 | 8.3 | 19.4 | 19.7 | 19.7 | 20.6 | 3.14 | 2.3 | 3.78 | 5.03 | 0.68 | 0.60 |
| GETC10 x TNFC0926 | 69.0 | 46.69 | 60.9 | 59.2 | 285.5 | 267.5 | 91.9 | 70.0 | 58.8 | 38.8 | 8.1 | 9.0 | 7.1 | 6.2 | 8.4 | 7.9 | 19.1 | 19.1 | 19.1 | 20.4 | 3.33 | 2.0 | 3.85 | 5.12 | 0.63 | 0.65 |
| GETC 15 x CO(FC) 8 | 51.4 | 55.88 | 59.6 | 59.4 | 281.5 | 250.5 | 81.7 | 76.3 | 66.4 | 30.9 | 8.0 | 10.0 | 7.3 | 6.7 | 8.5 | 8.0 | 19.3 | 20.1 | 20.1 | 19.5 | 2.65 | 1.8 | 3.49 | 5.08 | 0.66 | 0.63 |
| GETC 15 x CO 9 | 63.3 | 60.09 | 61.1 | 62.3 | 265.5 | 246.7 | 83.5 | 69.9 | 56.7 | 44.0 | 8.1 | 8.2 | 6.7 | 7.9 | 8.6 | 8.0 | 18.8 | 20.0 | 20.0 | 19.0 | 3.25 | 2.1 | 3.90 | 5.18 | 0.62 | 0.61 |
| GETC 15 x TNFC0926 | 30.1 | 65.90 | 61.7 | 59.5 | 261.5 | 215.9 | 86.7 | 66.9 | 68.9 | 43.2 | 8.6 | 6.9 | 6.8 | 7.1 | 8.1 | 8.5 | 18.9 | 21.6 | 21.6 | 19.2 | 3.47 | 2.1 | 3.99 | 5.28 | 0.78 | 0.60 |
| GETC 18 x CO(FC) 8 | 34.3 | 68.82 | 60.5 | 61.8 | 290.9 | 207.3 | 93.9 | 61.5 | 73.8 | 57.9 | 8.3 | 8.5 | 7.3 | 6.5 | 8.4 | 8.5 | 18.6 | 21.4 | 21.4 | 19.8 | 3.35 | 2.2 | 3.97 | 5.22 | 0.68 | 0.64 |
| GETC 18 x CO 9 | 35.9 | 63.56 | 61.8 | 61.6 | 297.5 | 204.6 | 95.8 | 88.0 | 58.0 | 49.0 | 8.7 | 7.5 | 6.6 | 5.8 | 8.4 | 8.3 | 18.9 | 21.4 | 21.4 | 19.9 | 2.83 | 1.7 | 3.69 | 5.32 | 0.54 | 0.63 |
| GETC 18 x TNFC0926 | 30.4 | 68.87 | 62.6 | 60.6 | 274.2 | 219.9 | 92.5 | 60.7 | 63.5 | 54.8 | 8.2 | 10.2 | 7.0 | 6.5 | 8.4 | 8.6 | 18.6 | 21.1 | 21.1 | 20.2 | 3.62 | 2.4 | 4.13 | 5.43 | 0.67 | 0.60 |

Table 4 (continued)

| Genotypes | DMY |  | DFF |  | GFY |  | PH |  | NOL |  | LL |  | LW |  | ASH |  | CPR |  | CFB |  | CFT |  | NPB |  | LSR |  |
| --- | --- | --- | --- | --- | --- | --- | --- | --- | --- | --- | --- | --- | --- | --- | --- | --- | --- | --- | --- | --- | --- | --- | --- | --- | --- | --- |
|  | Y1 | Y2 | Y1 | Y2 | Y1 | Y2 | Y1 | Y2 | Y1 | Y2 | Y1 | Y2 | Y1 | Y2 | Y1 | Y2 | Y1 | Y2 | Y1 | Y2 | Y1 | Y2 | Y1 | Y2 | Y1 | Y2 |
| GETC 21 x CO(FC) 8 | 29.0 | 59.74 | 61.4 | 63.7 | 285.9 | 181.2 | 90.8 | 71.3 | 43.7 | 42.4 | 7.8 | 10.2 | 7.8 | 6.1 | 8.3 | 7.8 | 19.2 | 21.5 | 21.5 | 19.8 | 3.76 | 2.6 | 4.28 | 5.36 | 0.64 | 0.64 |
| GETC 21 x CO 9 | 32.6 | 49.68 | 62.6 | 61.4 | 253.7 | 184.0 | 90.1 | 74.2 | 27.6 | 30.5 | 7.7 | 9.7 | 8.0 | 6.0 | 8.3 | 7.7 | 19.0 | 21.4 | 21.4 | 19.1 | 3.18 | 2.1 | 3.96 | 5.47 | 0.50 | 0.71 |
| GETC 21 x TNFC0926 | 32.7 | 46.71 | 63.4 | 60.7 | 196.0 | 220.2 | 96.1 | 31.4 | 44.1 | 41.7 | 8.4 | 9.2 | 7.7 | 6.7 | 8.5 | 8.1 | 19.2 | 21.7 | 21.7 | 19.7 | 3.29 | 1.8 | 3.98 | 5.58 | 0.53 | 0.67 |
| GETC 23 x CO(FC) 8 | 38.6 | 51.48 | 62.1 | 61.4 | 191.4 | 217.4 | 92.9 | 86.8 | 45.8 | 58.6 | 8.0 | 7.9 | 7.8 | 6.6 | 8.4 | 8.3 | 19.3 | 21.4 | 21.4 | 20.1 | 2.78 | 1.8 | 3.71 | 5.50 | 0.80 | 0.62 |
| GETC 23 x CO 9 | 37.6 | 61.34 | 63.5 | 63.3 | 198.0 | 250.8 | 85.7 | 50.4 | 36.1 | 64.3 | 8.4 | 7.7 | 6.9 | 6.2 | 8.3 | 8.0 | 18.9 | 21.5 | 21.5 | 19.8 | 3.16 | 2.1 | 4.00 | 5.62 | 0.65 | 0.60 |
| GETC 23 x TNFC0926 | 35.1 | 45.41 | 64.2 | 61.1 | 203.1 | 277.5 | 89.5 | 64.2 | 39.5 | 72.2 | 8.4 | 9.6 | 7.2 | 6.2 | 8.4 | 8.6 | 19.4 | 21.4 | 21.4 | 20.0 | 3.41 | 2.1 | 4.11 | 5.74 | 0.75 | 0.66 |
| GETC 40 x CO(FC) 8 | 31.0 | 54.78 | 62.9 | 60.8 | 239.8 | 241.4 | 89.3 | 55.3 | 39.5 | 72.5 | 8.1 | 6.7 | 7.2 | 6.1 | 8.2 | 8.2 | 19.1 | 21.3 | 21.3 | 19.8 | 3.80 | 2.8 | 4.40 | 5.64 | 0.83 | 0.71 |
| GETC 40 x CO 9 | 32.6 | 58.63 | 64.3 | 62.1 | 274.1 | 226.6 | 87.0 | 47.7 | 36.3 | 70.2 | 8.1 | 9.9 | 6.8 | 6.3 | 7.7 | 8.1 | 19.3 | 21.3 | 21.3 | 19.6 | 3.59 | 2.7 | 4.31 | 5.77 | 0.60 | 0.73 |
| GETC 40 x TNFC0926 | 33.6 | 50.40 | 64.9 | 60.0 | 286.0 | 212.1 | 84.2 | 80.9 | 43.7 | 72.7 | 8.7 | 6.9 | 7.0 | 6.9 | 8.2 | 8.4 | 20.0 | 21.5 | 21.5 | 19.5 | 4.25 | 2.9 | 4.68 | 5.89 | 0.63 | 0.69 |
| GETC 41 x CO(FC) 8 | 32.2 | 59.80 | 63.8 | 63.1 | 243.0 | 214.0 | 89.2 | 58.6 | 49.1 | 69.2 | 8.0 | 10.2 | 7.8 | 6.8 | 8.6 | 8.4 | 19.4 | 20.8 | 20.8 | 18.8 | 3.56 | 2.5 | 4.30 | 5.79 | 0.60 | 0.68 |
| GETC 41 x CO 9 | 39.3 | 53.19 | 65.1 | 63.1 | 304.7 | 187.3 | 88.7 | 42.1 | 41.7 | 76.7 | 7.9 | 8.7 | 7.0 | 6.0 | 8.3 | 7.9 | 20.1 | 20.8 | 20.8 | 18.8 | 4.23 | 3.0 | 4.77 | 5.92 | 0.60 | 0.64 |
| GETC 41 x TNFC0926 | 35.6 | 35.61 | 65.9 | 62.8 | 262.7 | 207.0 | 92.0 | 63.7 | 35.5 | 76.3 | 7.6 | 8.2 | 7.3 | 6.1 | 8.3 | 7.2 | 19.8 | 21.5 | 21.5 | 18.7 | 3.51 | 2.2 | 4.27 | 6.05 | 0.67 | 0.73 |
| GETC 49 x CO(FC) 8 | 38.9 | 35.15 | 64.6 | 62.9 | 235.7 | 208.1 | 92.9 | 86.4 | 35.5 | 71.6 | 8.4 | 7.2 | 7.5 | 6.0 | 8.7 | 8.6 | 20.3 | 21.1 | 21.1 | 19.5 | 3.48 | 2.3 | 4.30 | 5.93 | 0.62 | 0.72 |
| GETC 49 x CO 9 | 33.4 | 31.81 | 66.0 | 63.8 | 227.0 | 187.0 | 88.4 | 77.8 | 44.6 | 77.5 | 8.1 | 7.0 | 6.2 | 6.6 | 8.3 | 8.2 | 19.8 | 21.4 | 21.4 | 19.4 | 3.23 | 2.4 | 4.19 | 6.07 | 0.60 | 0.71 |
| GETC 49 x TNFC0926 | 37.5 | 37.54 | 62.9 | 48.9 | 203.3 | 175.0 | 89.9 | 81.8 | 30.4 | 70.1 | 9.5 | 6.7 | 6.9 | 6.2 | 7.9 | 7.1 | 20.3 | 21.1 | 21.1 | 19.5 | 2.95 | 1.9 | 3.98 | 2.80 | 0.60 | 0.65 |
| Lsd0.05 | 3.67 | 4.85 | 0.416 | 4.33 | **31.9** | 31.98 | 9.57 | 10.00 | **16.48** | 16.96 | **0.5** | 0.82 | 0.749 | 1.36 | 1.07 | 0.61 | **1.08.** | 1.02 | **1.22** | 1.51 | **0.91** | **0.65** | **0.39** | 0.4 | **0.13** | **0.16.** |

NPB-Number of primary branches per plant, PH-Plant height (cm), NOL-Number of leaves per plant, CFB-Crude fiber content (%), CFT-Crude fat content (%), DMY-Dry matter yield per plant (g), DFF-Days to 50% flowering, CPR-Crude protein content (%), GFY-Green fodder yield per plant (g), LSR- Leaf stem ratio, LL- Leaf length(cm), and LW- Leaf width(cm).

**Table 5:** General Combining Ability Effects of Parental Genotypes for Fodder Yield and Fodder Quality Traits During Two Years Using Line × Tester Hybrid Fodder Cowpea

| Genotype | DMY |  | DFF |  | GFY |  | PH |  | NOL |  | LL |  | LW |  |
| --- | --- | --- | --- | --- | --- | --- | --- | --- | --- | --- | --- | --- | --- | --- |
| **Lines** | Y1 | Y2 | Y1 | Y2 | Y1 | Y2 | Y1 | Y2 | Y1 | Y2 | Y1 | Y2 | Y1 | Y2 |
| CL 348 | -0.80 | 5.0** | -9.16** | -5.58** | -9.29 | 59.0** | 7.21** | 1.0 | -7.0 | 3.2 | 0.93** | -0.76** | -0.53** | 0.75** |
| CL 321-1 | -3.8****** | 1.5** | -8.27** | -1.27 | 0.84 | 50.9** | 1.18 | -29.7** | -8.5 | 7.7* | 1.52** | -0.39* | -0.19 | 0.26 |
| N 311 | -2.5** | 7.4** | -7.50** | -5.52** | 6.92 | 52.5** | -0.87 | 7.7** | -10.9** | 6.6 | -0.72** | 0.63** | -0.17 | -0.23 |
| IFC 9304 | 4.33** | 2.5** | -6.66** | -3.00** | -7.53 | 52.9** | 5.25** | 9.8** | -3.9 | 6.6 | -0.01 | -0.29 | -0.29 | 0.38 |
| IFC 9402 | 0.23 | 3.5** | -5.90** | -5.17** | 17.25* | 69.0** | 4.58* | 6.2** | -0.2 | -0.5 | 0.90** | -0.27 | 0.25 | -0.02 |
| CS 98 | -4.0** | 6.8** | -5.05** | -3.34** | 50.55** | 52.7** | -0.95 | 3.9 | 2.0 | -1.2 | 0.13 | -0.99** | 0.55** | 0.10 |
| FD 711 | 1.60* | -0.7 | -4.06** | -1.48 | 37.04** | 68.1** | 1.05 | -5.1* | 1.2 | 2.2 | 0.25* | 0.37* | 0.45** | -0.11 |
| FD 719 | -2.8** | -0.9 | -3.34** | -3.38** | 44.29** | 59.1** | -1.38 | 1.4 | 10.7** | 5.0 | -0.66** | 0.46** | -0.63** | 0.17 |
| FD 1052 | -3.6** | 2.0** | -2.50** | -2.70** | 46.33** | 15.9* | -2.45 | 1.2 | 12.3** | 7.3* | 0.93** | 0.60** | 0.57** | -0.09 |
| FD 1067 | 13.5** | 3.5** | -1.58** | -0.48 | 40.77** | -2.0 | 6.10** | 21.6** | 6.4 | 2.9 | 0.25* | -0.38* | -0.29 | -0.19 |
| FD 1259 | 16.50** | -1.0 | -0.71** | 0.66 | 38.24** | -4.2 | -9.95** | -0.8 | 2.4 | 1.5 | 0.83** | 0.36* | 0.38* | -0.21 |
| EC 467380 | 6.93** | -4** | -0.01 | -1.55 | 42.04** | -10.6 | -7.33** | -3.0 | 10.6** | 4.4 | 0.60** | 0.46** | 0.12 | -0.28 |
| EC 240806 | 11.13** | -0.3 | 0.91** | 0.66 | 35.71** | -0.5 | -3.46 | 0.9 | 6.0 | -3.8 | 0.02 | -0.31 | -0.35* | 0.09 |
| K – 13 -CP42 | 8.51** | 3.0** | 1.66** | -0.60 | 3.59 | 4.7 | -0.05 | -1.8 | 7.3* | -10.1* | -0.33** | 1.39** | 0.62** | 0.10 |
| GETC 6 | 6.32** | -2** | 2.56** | 1.41 | -20.34** | -6.9 | 3.37 | -6.2** | 13.5** | -18.5** | -0.17 | 0.73** | 0.15 | -0.38 |
| GETC10 | 18.54** | -2.8** | 3.48** | 3.53** | -12.91 | -13.6* | 2.85 | 4.3* | 9.4* | -18.8** | -0.47** | 0.22 | 0.29 | -0.11 |
| GETC 15 | 1.81* | 4.3** | 4.27** | 3.22** | -27.35** | -42.1** | -7.65** | 2.9 | 10.0** | -18.9** | -0.39** | -0.34* | -0.39* | 0.74** |
| GETC 18 | -12.9** | 10.7** | 5.13** | 4.16** | -7.90 | -69.2** | 4.36* | 2.0 | 11.1** | -4.3 | -0.39** | 0.02 | -0.29 | -0.20 |
| GETC 21 | -15.0** | -4.3** | 5.97** | 4.76** | -62.94** | -84.7** | 3.24 | -9.1** | -15.5** | -22.7** | -0.58** | 0.99** | 0.84** | -0.19 |
| GETC 23 | -9.34** | -3.6** | 6.78** | 4.76** | -91.37** | -31.3** | -2.18 | -1.0 | -13.6** | 10.4** | -0.49** | -0.27 | -0.28 | -0.15 |
| GETC 40 | -14.0** | -1.8** | 7.54** | 3.76** | -15.44* | -53.1** | -3.83 | -6.8** | -14.2** | 11.9** | -0.32** | -0.84** | 0.04 | -0.05 |
| GETC 41 | -10.7** | -6.8** | 8.45** | 5.83** | -33.75** | -77.0** | 1.25 | -13.3** | -11.9** | 15.8** | -0.82** | 0.37 | 0.01 | -0.17 |
| GETC 49 | -9.83** | -21** | 8.00** | 1.33 | -74.75** | -89.8** | -0.36 | 13.9** | -17.2** | 13.5** | -0.99** | -1.74* | -0.85** | -0.21 |
| **Tester** |  |  |  |  |  |  |  |  |  |  |  |  |  |  |
| CO(FC) 8 | 0.47 | 0.43* | -1.127** | -0.31 |  | 3.7 | 0.6 | -1.0 | 1.64 | 0.20 | 0.07 | 0.36** | 0.06 | -0.07 |
| CO 9 | 0.30 | 1.46** | 0.288** | 1.00** | 0 | -6.3** | -2.4** | 2.2** | -1.66 | 0.79 | -0.10* | -0.22** | -0.17** | 0.04 |
| TNFC0926 | -0.77** | -1.8** | 0.839** | -0.69* | - | 2.6 | 1.8* | -1.2 | 0.02 | -0.99 | 0.02 | -0.14* | 0.11 | 0.03 |

**Table 5:** (continued)

| Genotype | ASH |  | CPR |  | CFB |  | CFT |  | NPB |  | LSR |  |
| --- | --- | --- | --- | --- | --- | --- | --- | --- | --- | --- | --- | --- |
| **Lines** | Y1 | Y2 | Y1 | Y2 | Y1 | Y2 | Y1 | Y2 | Y1 | Y2 | Y1 | Y2 |
| CL 348 | 0.28 | 0.14 | -1.4** | -3.1** | 5.00** | -1.1** | 0.29 | 0.68** | -1.48** | -1.63** | -0.04 | 0.00 |
| CL 321-1 | 0.21 | 0.22 | -1.6** | -2.0** | 4.20** | -0.9* | 0.21 | 0.55** | -1.35** | -1.48** | 0.01 | 0.02 |
| N 311 | -0.08 | 0.31* | -1.3** | -1.0** | 0.79** | -1.7** | 0.10 | 0.71** | -1.21** | -1.33** | 0.02 | 0.04 |
| IFC 9304 | 0.01 | -0.04 | -1.0** | -1.7** | -2.47** | -2.2** | -0.01 | 0.40** | -1.08** | -1.19** | -0.07* | 0.02 |
| IFC 9402 | -0.05 | 0.01 | -0.9** | -0.9** | -1.71** | -1.7** | 0.23 | 0.44** | -0.95** | -1.04** | 0.14** | 0.02 |
| CS 98 | -0.21 | -0.33* | -0.5* | -2.0** | -2.85** | -1.8** | 0.14 | 0.57** | -0.81** | -0.89** | 0.04 | 0.02 |
| FD 711 | -0.09 | 0.44** | -0.3 | -3.0** | -3.80** | -1.7** | 0.46* | 0.17 | -0.67** | -0.74** | 0.00 | 0.00 |
| FD 719 | -0.13 | 0.20 | 0.1 | -2.1** | -2.90** | 0.0 | 0.76** | 0.28 | -0.54** | -0.59** | -0.03 | 0.02 |
| FD 1052 | -0.14 | -0.23 | 0.0 | -0.6** | -1.38** | 2.3** | 0.86** | 0.32* | -0.41** | -0.44** | -0.02 | -0.04 |
| FD 1067 | 0.17 | 0.44** | 0.1 | 0.3 | -0.48 | 2.2** | 0.96** | 0.41** | -0.27** | -0.30** | 0.01 | -0.07 |
| FD 1259 | 0.21 | 0.05 | 0.2 | 0.0 | -0.85 | 1.7** | -0.39* | 0.10 | -0.13 | -0.15 | 0.06* | -0.01 |
| EC 467380 | 0.00 | 0.08 | 0.5* | 0.3 | -0.49 | 2.1** | -0.72** | 0.13 | 0.00 | 0.00 | -0.10** | -0.03 |
| EC 240806 | 0.36 | 0.35** | 0.1 | 0.4 | -0.41 | 2.5** | -0.35 | -0.07 | 0.13 | 0.15 | 0.03 | 0.01 |
| K – 13 -CP42 | 0.10 | 0.00 | 0.2 | 0.4 | -0.44 | 1.0* | -0.44* | 0.20 | 0.27** | 0.30** | -0.05 | -0.03 |
| GETC 6 | 0.04 | 0.16 | 0.5* | 0.3 | -0.46 | 0.3 | -0.30 | 0.17 | 0.40** | 0.44** | 0.04 | 0.03 |
| GETC10 | 0.00 | -0.14 | 0.5* | 0.2 | -0.58* | 0.6 | -0.47* | -0.62** | 0.54** | 0.59** | 0.04 | -0.02 |
| GETC 15 | 0.09 | -0.06 | 0.3 | 1.4** | 0.61* | -0.5 | -0.46* | -0.97** | 0.67** | 0.74** | 0.03 | -0.04 |
| GETC 18 | -0.08 | -0.06 | 0.0 | 2.2** | 1.35** | 0.2 | -0.34 | -0.78** | 0.81** | 0.89** | -0.03 | -0.03 |
| GETC 21 | 0.02 | -0.25* | 0.5 | 2.4** | 1.60** | -0.2 | -0.53** | -0.72** | 0.95** | 1.04** | -0.10** | 0.02 |
| GETC 23 | -0.08 | -0.16 | 0.5* | 2.3** | 1.49** | 0.2 | -0.50** | -0.86** | 1.08** | 1.19** | 0.08** | -0.03 |
| GETC 40 | -0.32 | 0.01 | 0.8** | 2.2** | 1.41** | -0.1 | 0.38* | -0.10 | 1.22** | 1.33** | 0.03 | 0.06 |
| GETC 41 | 0.05 | -0.49** | 1.1** | 1.9** | 1.05** | -1.0* | 0.26 | -0.29* | 1.35** | 1.48** | -0.03 | 0.03 |
| GETC 49 | -0.33 | -0.66** | 1.5** | 2.1** | 1.30** | -0.3 | -0.15 | -0.70** | 1.49** | 1.63** | -0.05 | 0.04 |
| **Tester** |  |  |  |  |  |  |  |  |  |  |  |  |
| CO(FC) 8 | 0.10 | -0.08 | -0.07 | -0.13 | 0.04 | -0.19 | -0.02 | 0.05 | 0.003 | -0.07 | 0.01 | -0.002 |
| CO 9 | -0.06 | -0.01 | 0.02 | 0.09 | 0.02 | 0.11 | 0.00 | 0.05 | 0.079** | 0.00 | -0.02 | 0.001 |
| TNFC0926 | -0.04 | 0.10* | 0.05 | 0.04 | -0.06 | 0.08 | 0.02 | -0.09 | -0.082** | 0.07 | 0.01 | 0 |

* and** and Significant at P=0.05 and P=0.01 levels, respectively .NPB-Number of primary branches per plant, PH-Plant height (cm), NOL-Number of leaves per plant, CFB-Crude fiber content (%), CFT-Crude fat content (%), DMY-Dry matter yield per plant (g), DFF-Days to 50% flowering, CPR-Crude protein content (%), GFY-Green fodder yield per plant (g), LSR- Leaf stem ratio, LL- Leaf length(cm), and LW- Leaf width(cm).

**Table 6** Estimates of Specific Combining Ability for Fodder Yield and Quality Traits Over Two Years Using Line x Tester Hybrids of Fodder Cowpea

| Genotype | DMY |  | DFF |  | GFY |  | PH |  | NOL |  | LL |  | LW |  | ASH |  |
| --- | --- | --- | --- | --- | --- | --- | --- | --- | --- | --- | --- | --- | --- | --- | --- | --- |
| CL 348 x CO(FC) 8 | -2.5ns | -4.426** | -0.153ⁿˢ | -2.295ⁿˢ | -9.382ⁿˢ | -11.438ⁿˢ | -4.477ⁿˢ | -3.202ⁿˢ | 1.448ⁿˢ | 2.108ⁿˢ | 0.075ⁿˢ | -0.63* | 0.081ⁿˢ | 0.345ⁿˢ | 0.025ⁿˢ | -0.023ⁿˢ |
| CL 348 x CO 9 | -2.5* | 0.542ns | -0.026ⁿˢ | 0.637ⁿˢ | -9.361ⁿˢ | 6.42ⁿˢ | 4.647ⁿˢ | 15.955** | 3.686ⁿˢ | -8.821ⁿˢ | -0.762** | 1.73** | 0.046ⁿˢ | 0.108ⁿˢ | 0.13ⁿˢ | 0.138ⁿˢ |
| CL 348 x TNFC0926 | 5.1** | 3.884** | 0.179ⁿˢ | 1.658ⁿˢ | 18.743ⁿˢ | 5.018ⁿˢ | -0.17ⁿˢ | -12.753** | -5.134ⁿˢ | 6.714ⁿˢ | 0.687** | -1.101** | -0.127ⁿˢ | -0.454ⁿˢ | -0.155ⁿˢ | -0.115ⁿˢ |
| CL 321-1 x CO(FC) 8 | 8.8** | 8.66** | -0.097ⁿˢ | -2.012ⁿˢ | -18.319ⁿˢ | 3.103ⁿˢ | -2.248ⁿˢ | 1.876ⁿˢ | -3.807ⁿˢ | 3.043ⁿˢ | -0.25ⁿˢ | 0.632* | 0.536* | 0.019ⁿˢ | -0.053ⁿˢ | -0.213ⁿˢ |
| CL 321-1 x CO 9 | -2.4ns | -1.566ns | -0.007ⁿˢ | 0.663ⁿˢ | 27.179* | 14.791ⁿˢ | -4.061ⁿˢ | -4.819ⁿˢ | -1.759ⁿˢ | 3.97ⁿˢ | 0.01ⁿˢ | -0.202ⁿˢ | -0.546* | 0.192ⁿˢ | 0.022ⁿˢ | 0.197ⁿˢ |
| CL 321-1 x TNFC0926 | -6.4** | -7.094** | 0.104ⁿˢ | 1.349ⁿˢ | -8.86ⁿˢ | -17.895ⁿˢ | 6.308ⁿˢ | 2.943ⁿˢ | 5.566ⁿˢ | -7.014ⁿˢ | 0.24ⁿˢ | -0.43ⁿˢ | 0.011ⁿˢ | -0.211ⁿˢ | 0.031ⁿˢ | 0.016ⁿˢ |
| N 311 x CO(FC) 8 | -3.7** | -5.745** | -0.184ⁿˢ | -4.409** | -0.172ⁿˢ | 17.552ⁿˢ | 0.967ⁿˢ | 5.588ⁿˢ | 6.67ⁿˢ | 2.251ⁿˢ | -0.418* | 0.336ⁿˢ | 0.343ⁿˢ | 0.054ⁿˢ | -0.416ⁿˢ | -0.404ⁿˢ |
| N 311 x CO 9 | -4.5** | 0.172ns | -0.002ⁿˢ | 4.443** | -19.561ⁿˢ | 0.667ⁿˢ | -5.399ⁿˢ | -1.571ⁿˢ | -4.495ⁿˢ | -6.369ⁿˢ | 0.158ⁿˢ | 1.379** | -0.52ⁿˢ | -0.165ⁿˢ | 0.245ⁿˢ | 0.12ⁿˢ |
| N 311 x TNFC0926 | 8.2** | 5.573** | 0.186ⁿˢ | -0.034ⁿˢ | 19.733ⁿˢ | -18.219ⁿˢ | 4.432ⁿˢ | -4.017ⁿˢ | -2.175ⁿˢ | 4.118ⁿˢ | 0.259ⁿˢ | -1.716** | 0.177ⁿˢ | 0.111ⁿˢ | 0.171ⁿˢ | 0.285ⁿˢ |
| IFC 9304 x CO(FC) 8 | -0.2ns | 7.392** | -0.049ⁿˢ | 2.941ⁿˢ | 4.606ⁿˢ | -18.823ⁿˢ | -1.358ⁿˢ | -10.871** | -5.519ⁿˢ | -1.439ⁿˢ | 1.735** | 0.215ⁿˢ | -0.828** | -0.154ⁿˢ | 0.247ⁿˢ | -0.399ⁿˢ |
| IFC 9304 x CO 9 | 2.9* | 1.638ns | -0.114ⁿˢ | -3.002ⁿˢ | -9.45ⁿˢ | 17.066ⁿˢ | 6.215ⁿˢ | -1.683ⁿˢ | 2.652ⁿˢ | 1.779ⁿˢ | -0.645** | -1.283** | 0.367ⁿˢ | 0.008ⁿˢ | 0.005ⁿˢ | 0.475* |
| IFC 9304 x TNFC0926 | -2.6* | -9.03** | 0.164ⁿˢ | 0.062ⁿˢ | 4.844ⁿˢ | 1.756ⁿˢ | -4.857ⁿˢ | 12.555** | 2.867ⁿˢ | -0.34ⁿˢ | -1.09** | 1.067** | 0.462ⁿˢ | 0.146ⁿˢ | -0.253ⁿˢ | -0.076ⁿˢ |
| IFC 9402 x CO(FC) 8 | -7.1** | 0.487ns | 0.035ⁿˢ | -0.327ⁿˢ | 12.828ⁿˢ | -14.277ⁿˢ | -5.842ⁿˢ | 11.026** | 0.144ⁿˢ | -3.773ⁿˢ | -0.02ⁿˢ | -0.291ⁿˢ | 0.571* | 0.075ⁿˢ | 0.207ⁿˢ | 0.215ⁿˢ |
| IFC 9402 x CO 9 | -0.2ns | -2.57* | -0.117ⁿˢ | -2.467ⁿˢ | 14.106ⁿˢ | 5.311ⁿˢ | 2.556ⁿˢ | -6.177ⁿˢ | -4.236ⁿˢ | 3.775ⁿˢ | -0.867** | -0.929** | -0.738** | -0.013ⁿˢ | -0.241ⁿˢ | 0.493* |
| IFC 9402 x TNFC0926 | 7.39** | 2.083* | 0.081ⁿˢ | 2.794ⁿˢ | -26.934* | 8.967ⁿˢ | 3.285ⁿˢ | -4.849ⁿˢ | 4.092ⁿˢ | -0.001ⁿˢ | 0.887** | 1.22** | 0.167ⁿˢ | -0.062ⁿˢ | 0.034ⁿˢ | -0.709** |
| CS 98 x CO(FC) 8 | -5.03** | -8.546** | -0.039ⁿˢ | 2.428ⁿˢ | -16.401ⁿˢ | -6.192ⁿˢ | 2.81ⁿˢ | 11.244** | -10.592ⁿˢ | 0.398ⁿˢ | -0.552** | 1.804** | 0.391ⁿˢ | -0.166ⁿˢ | -0.007ⁿˢ | -0.288ⁿˢ |
| CS 98 x CO 9 | 10.65** | 2.346* | -0.052ⁿˢ | -0.66ⁿˢ | 8.924ⁿˢ | -2.736ⁿˢ | 0.183ⁿˢ | 0.631ⁿˢ | 8.208ⁿˢ | 1.516ⁿˢ | 1.608** | -0.81** | -0.605* | 0.156ⁿˢ | -0.072ⁿˢ | -0.363ⁿˢ |
| CS 98 x TNFC0926 | -5.62** | 6.2** | 0.092ⁿˢ | -1.768ⁿˢ | 7.478ⁿˢ | 8.928ⁿˢ | -2.993ⁿˢ | -11.875** | 2.384ⁿˢ | -1.914ⁿˢ | -1.056** | -0.994** | 0.215ⁿˢ | 0.01ⁿˢ | 0.08ⁿˢ | 0.65** |
| FD 711 x CO(FC) 8 | 3.71** | -1.847ns | -0.053ⁿˢ | -0.195ⁿˢ | 5.039ⁿˢ | 15.207ⁿˢ | -2.548ⁿˢ | 11.007** | 0.662ⁿˢ | -1.288ⁿˢ | -0.547** | -0.508ⁿˢ | 0.338ⁿˢ | -0.151ⁿˢ | 0.047ⁿˢ | -0.066ⁿˢ |
| FD 711 x CO 9 | 3.98** | 2.289* | -0.062ⁿˢ | -0.376ⁿˢ | -5.666ⁿˢ | -22.458ⁿˢ | 1.164ⁿˢ | -0.037ⁿˢ | -2.299ⁿˢ | 3.73ⁿˢ | 0.794** | -0.316ⁿˢ | 0.68* | -0.091ⁿˢ | 0.065ⁿˢ | 0.232ⁿˢ |
| FD 711 x TNFC0926 | -7.69** | -0.442ns | 0.115ⁿˢ | 0.57ⁿˢ | 0.628ⁿˢ | 7.25ⁿˢ | 1.384ⁿˢ | -10.97** | 1.637ⁿˢ | -2.442ⁿˢ | -0.247ⁿˢ | 0.824** | -1.019** | 0.242ⁿˢ | -0.113ⁿˢ | -0.166ⁿˢ |
| FD 719 x CO(FC) 8 | 4.41** | 5.244** | -0.14ⁿˢ | -1.981ⁿˢ | -21.324ⁿˢ | 10.319ⁿˢ | 5.428ⁿˢ | 1.319ⁿˢ | -6.531ⁿˢ | 4.745ⁿˢ | 0.2ⁿˢ | 0.934** | -0.2ⁿˢ | -0.378ⁿˢ | -0.216ⁿˢ | 0.442* |
| FD 719 x CO 9 | 1.93ns | -8.876** | -0.031ⁿˢ | 0.268ⁿˢ | 12.2ⁿˢ | -6.502ⁿˢ | 1.484ⁿˢ | 1.605ⁿˢ | 6.147ⁿˢ | 1.038ⁿˢ | 0.167ⁿˢ | -0.603* | -0.033ⁿˢ | 0.139ⁿˢ | -0.068ⁿˢ | -0.626** |
| FD 719 x TNFC0926 | -6.34** | 3.632** | 0.17ⁿˢ | 1.713ⁿˢ | 9.124ⁿˢ | -3.818ⁿˢ | -6.912* | -2.924ⁿˢ | 0.384ⁿˢ | -5.783ⁿˢ | -0.368ⁿˢ | -0.331ⁿˢ | 0.233ⁿˢ | 0.239ⁿˢ | 0.284ⁿˢ | 0.184ⁿˢ |
| FD 1052 x CO(FC) 8 | -4.90** | 3.954** | -0.037ⁿˢ | 0.117ⁿˢ | -0.378ⁿˢ | 30.598** | 2.854ⁿˢ | -20.183** | 7.035ⁿˢ | 2.702ⁿˢ | 0.208ⁿˢ | -0.749* | 0.099ⁿˢ | 0.157ⁿˢ | 0.077ⁿˢ | -0.269ⁿˢ |
| FD 1052 x CO 9 | 1.87ns | -1.74ns | -0.053ⁿˢ | -0.184ⁿˢ | -19.743ⁿˢ | -35.845** | -0.493ⁿˢ | 10.041** | -4.589ⁿˢ | -2.498ⁿˢ | -0.532* | -0.535ⁿˢ | 0.249ⁿˢ | 0.356ⁿˢ | -0.068ⁿˢ | 0.397ⁿˢ |
| FD 1052 x TNFC0926 | 3.03* | -2.215* | 0.09ⁿˢ | 0.067ⁿˢ | 20.121ⁿˢ | 5.247ⁿˢ | -2.361ⁿˢ | 10.143** | -2.447ⁿˢ | -0.205ⁿˢ | 0.323ⁿˢ | 1.284** | -0.348ⁿˢ | -0.512ⁿˢ | -0.009ⁿˢ | -0.127ⁿˢ |

Table 6 (continued)

| Genotype | CPR |  | CFB |  | CFT |  | NPB |  | LSR |  |
| --- | --- | --- | --- | --- | --- | --- | --- | --- | --- | --- |
| CL 348 x CO(FC) 8 | -0.055ⁿˢ | 0.284ⁿˢ | -0.696ⁿˢ | -0.214ⁿˢ | 0.071ⁿˢ | -0.001ⁿˢ | 0.054ⁿˢ | 0.065ⁿˢ | 0.035ⁿˢ | -0.005ⁿˢ |
| CL 348 x CO 9 | -0.063ⁿˢ | 0.296ⁿˢ | 0.536ⁿˢ | -0.052ⁿˢ | -0.007ⁿˢ | -0.016ⁿˢ | 0.003ⁿˢ | 0.0ⁿˢ | -0.071ⁿˢ | -0.001ⁿˢ |
| CL 348 x TNFC0926 | 0.118ⁿˢ | -0.58ⁿˢ | 0.16ⁿˢ | 0.267ⁿˢ | -0.064ⁿˢ | 0.017ⁿˢ | -0.057ⁿˢ | -0.065ⁿˢ | 0.037ⁿˢ | 0.006ⁿˢ |
| CL 321-1 x CO(FC) 8 | 0.12ⁿˢ | -0.534ⁿˢ | 0.577ⁿˢ | 0.449ⁿˢ | -0.115ⁿˢ | -0.071ⁿˢ | 0.05ⁿˢ | 0.06ⁿˢ | 0.1* | 0.008ⁿˢ |
| CL 321-1 x CO 9 | -0.121ⁿˢ | 0.45ⁿˢ | -0.331ⁿˢ | -0.494ⁿˢ | 0.061ⁿˢ | -0.062ⁿˢ | 0.004ⁿˢ | 0.0ⁿˢ | -0.1* | -0.01ⁿˢ |
| CL 321-1 x TNFC0926 | 0.001ⁿˢ | 0.084ⁿˢ | -0.247ⁿˢ | 0.045ⁿˢ | 0.054ⁿˢ | 0.133ⁿˢ | -0.054ⁿˢ | -0.06ⁿˢ | -0.001ⁿˢ | 0.002ⁿˢ |
| N 311 x CO(FC) 8 | 0.033ⁿˢ | -0.47ⁿˢ | 2.845** | -0.187ⁿˢ | 0.095ⁿˢ | -0.261ⁿˢ | 0.046ⁿˢ | 0.053ⁿˢ | -0.129** | 0.007ⁿˢ |
| N 311 x CO 9 | -0.127ⁿˢ | 1.061** | 0.225ⁿˢ | -0.19ⁿˢ | 0.157ⁿˢ | 0.074ⁿˢ | 0.001ⁿˢ | 0.0ⁿˢ | 0.068ⁿˢ | -0.038ⁿˢ |
| N 311 x TNFC0926 | 0.094ⁿˢ | -0.591ⁿˢ | -3.07** | 0.376ⁿˢ | -0.253ⁿˢ | 0.187ⁿˢ | -0.048ⁿˢ | -0.054ⁿˢ | 0.061ⁿˢ | 0.031ⁿˢ |
| IFC 9304 x CO(FC) 8 | -0.167ⁿˢ | 0.58ⁿˢ | 0.408ⁿˢ | 0.612ⁿˢ | 0.077ⁿˢ | 0.127ⁿˢ | 0.04ⁿˢ | 0.047ⁿˢ | -0.048ⁿˢ | -0.008ⁿˢ |
| IFC 9304 x CO 9 | 0.286ⁿˢ | -1.006** | -0.937* | -0.142ⁿˢ | -0.102ⁿˢ | 0.109ⁿˢ | 0.002ⁿˢ | 0.0ⁿˢ | 0.164** | 0.007ⁿˢ |
| IFC 9304 x TNFC0926 | -0.119ⁿˢ | 0.426ⁿˢ | 0.529ⁿˢ | -0.47ⁿˢ | 0.025ⁿˢ | -0.235ⁿˢ | -0.042ⁿˢ | -0.047ⁿˢ | -0.116* | 0.002ⁿˢ |
| IFC 9402 x CO(FC) 8 | -0.302ⁿˢ | -0.09ⁿˢ | -0.262ⁿˢ | 0.746ⁿˢ | 0.124ⁿˢ | 0.105ⁿˢ | 0.045ⁿˢ | 0.042ⁿˢ | -0.074ⁿˢ | -0.013ⁿˢ |
| IFC 9402 x CO 9 | 0.379ⁿˢ | -0.754* | -0.685ⁿˢ | -0.823ⁿˢ | -0.037ⁿˢ | -0.071ⁿˢ | 0.002ⁿˢ | 0.0ⁿˢ | 0.052ⁿˢ | 0.023ⁿˢ |
| IFC 9402 x TNFC0926 | -0.078ⁿˢ | 0.843* | 0.947* | 0.077ⁿˢ | -0.087ⁿˢ | -0.033ⁿˢ | -0.047ⁿˢ | -0.042ⁿˢ | 0.022ⁿˢ | -0.009ⁿˢ |
| CS 98 x CO(FC) 8 | -0.05ⁿˢ | 0.924* | 0.752ⁿˢ | 0.252ⁿˢ | -0.213ⁿˢ | 0.12ⁿˢ | 0.028ⁿˢ | 0.035ⁿˢ | -0.022ⁿˢ | 0.012ⁿˢ |
| CS 98 x CO 9 | 0.127ⁿˢ | 0.228ⁿˢ | 0.297ⁿˢ | 0.131ⁿˢ | -0.068ⁿˢ | -0.211ⁿˢ | 0.0ⁿˢ | 0.0ⁿˢ | -0.009ⁿˢ | -0.006ⁿˢ |
| CS 98 x TNFC0926 | -0.077ⁿˢ | -1.152** | -1.048* | -0.383ⁿˢ | 0.282ⁿˢ | 0.09ⁿˢ | -0.028ⁿˢ | -0.035ⁿˢ | 0.031ⁿˢ | -0.005ⁿˢ |
| FD 711 x CO(FC) 8 | 0.164ⁿˢ | -0.455ⁿˢ | -0.627ⁿˢ | 0.151ⁿˢ | -0.267ⁿˢ | 0.089ⁿˢ | 0.025ⁿˢ | 0.03ⁿˢ | 0.066ⁿˢ | 0.009ⁿˢ |
| FD 711 x CO 9 | 0.127ⁿˢ | -0.158ⁿˢ | -0.089ⁿˢ | -0.175ⁿˢ | -0.446ⁿˢ | 0.447ⁿˢ | 0.001ⁿˢ | 0.0ⁿˢ | 0.002ⁿˢ | -0.01ⁿˢ |
| FD 711 x TNFC0926 | -0.291ⁿˢ | 0.613ⁿˢ | 0.716ⁿˢ | 0.024ⁿˢ | 0.713* | -0.536* | -0.025ⁿˢ | -0.03ⁿˢ | -0.068ⁿˢ | 0.001ⁿˢ |
| FD 719 x CO(FC) 8 | -0.037ⁿˢ | 0.193ⁿˢ | 0.02ⁿˢ | 0.345ⁿˢ | -0.024ⁿˢ | 0.046ⁿˢ | 0.022ⁿˢ | 0.024ⁿˢ | -0.053ⁿˢ | -0.018ⁿˢ |
| FD 719 x CO 9 | 0.0ⁿˢ | -0.233ⁿˢ | -0.164ⁿˢ | -0.176ⁿˢ | 0.165ⁿˢ | 0.054ⁿˢ | -0.003ⁿˢ | 0.0ⁿˢ | 0.086ⁿˢ | -0.004ⁿˢ |
| FD 719 x TNFC0926 | 0.037ⁿˢ | 0.04ⁿˢ | 0.144ⁿˢ | -0.169ⁿˢ | -0.141ⁿˢ | -0.099ⁿˢ | -0.019ⁿˢ | -0.024ⁿˢ | -0.033ⁿˢ | 0.023ⁿˢ |
| FD 1052 x CO(FC) 8 | -0.041ⁿˢ | -1.211** | -1.384** | -0.477ⁿˢ | -0.169ⁿˢ | -0.233ⁿˢ | 0.021ⁿˢ | 0.018ⁿˢ | 0.052ⁿˢ | 0.056ⁿˢ |
| FD 1052 x CO 9 | 0.226ⁿˢ | 0.977** | 1.046* | 0.37ⁿˢ | 0.275ⁿˢ | 0.23ⁿˢ | 0.001ⁿˢ | 0.001ⁿˢ | -0.001ⁿˢ | -0.015ⁿˢ |
| FD 1052 x TNFC0926 | -0.185ⁿˢ | 0.234ⁿˢ | 0.338ⁿˢ | 0.108ⁿˢ | -0.105ⁿˢ | 0.003ⁿˢ | -0.022ⁿˢ | -0.019ⁿˢ | -0.05ⁿˢ | -0.041ⁿˢ |

Table 6 (continued)

| **Genotype** | **DMY** |  | **DFF** |  | **GFY** |  | **PH** |  | **NOL** |  | **LL** |  | **LW** |  |
| --- | --- | --- | --- | --- | --- | --- | --- | --- | --- | --- | --- | --- | --- | --- |
| FD 1067 x CO(FC) 8 | 6.52** | -1.297ns | -0.016ⁿˢ | 0.547ⁿˢ | 9.586ⁿˢ | 23.404* | 0.704ⁿˢ | -5.329ⁿˢ | -6.442ⁿˢ | -7.076ⁿˢ | 0.579** | 0.651* | 0.066ⁿˢ | -0.262ⁿˢ |
| FD 1067 x CO 9 | -6.26** | 1.009ns | -0.077ⁿˢ | -0.681ⁿˢ | -7.4ⁿˢ | -45.201** | 0.932ⁿˢ | 6.448ⁿˢ | -0.26ⁿˢ | 7.52ⁿˢ | -0.224ⁿˢ | -0.976** | -0.125ⁿˢ | -0.172ⁿˢ |
| FD 1067 x TNFC0926 | -0.25ns | 0.288ns | 0.093ⁿˢ | 0.134ⁿˢ | -2.186ⁿˢ | 21.797ⁿˢ | -1.636ⁿˢ | -1.119ⁿˢ | 6.702ⁿˢ | -0.444ⁿˢ | -0.356ⁿˢ | 0.325ⁿˢ | 0.059ⁿˢ | 0.434ⁿˢ |
| FD 1259 x CO(FC) 8 | -7.50** | 0.383ns | -0.01ⁿˢ | 0.684ⁿˢ | -10.841ⁿˢ | -11.697ⁿˢ | -1.28ⁿˢ | -16.126** | -3.6ⁿˢ | 0.207ⁿˢ | 0.581** | 1.081** | 0.249ⁿˢ | -0.183ⁿˢ |
| FD 1259 x CO 9 | 4.35** | -6.258** | -0.127ⁿˢ | -1.712ⁿˢ | -1.626ⁿˢ | 23.167* | -0.244ⁿˢ | -1.336ⁿˢ | 0.133ⁿˢ | -3.611ⁿˢ | -0.838** | -1.481** | 0.811** | -0.13ⁿˢ |
| FD 1259 x TNFC0926 | 3.15* | 5.875** | 0.137ⁿˢ | 1.028ⁿˢ | 12.468ⁿˢ | -11.471ⁿˢ | 1.524ⁿˢ | 17.462** | 3.467ⁿˢ | 3.403ⁿˢ | 0.257ⁿˢ | 0.4ⁿˢ | -1.06** | 0.313ⁿˢ |
| EC 467380 x CO(FC) 8 | 8.48** | -6.464** | -0.125ⁿˢ | -1.686ⁿˢ | -5.861ⁿˢ | -9.421ⁿˢ | 6.48ⁿˢ | 0.657ⁿˢ | 5.657ⁿˢ | 7.648ⁿˢ | -0.82** | -0.344ⁿˢ | 0.207ⁿˢ | 0.385ⁿˢ |
| EC 467380 x CO 9 | -5.28** | 0.467ns | 0.0ⁿˢ | 0.892ⁿˢ | -5.886ⁿˢ | 2.77ⁿˢ | -3.451ⁿˢ | -12.533** | 0.518ⁿˢ | -2.424ⁿˢ | 1.239** | 0.433ⁿˢ | -0.142ⁿˢ | -0.315ⁿˢ |
| EC 467380 x TNFC0926 | -3.19* | 5.996** | 0.126ⁿˢ | 0.793ⁿˢ | 11.748ⁿˢ | 6.651ⁿˢ | -3.029ⁿˢ | 11.876** | -6.175ⁿˢ | -5.224ⁿˢ | -0.418* | -0.089ⁿˢ | -0.065ⁿˢ | -0.07ⁿˢ |
| EC 240806 x CO(FC) 8 | -5.24** | -3.316** | -0.119ⁿˢ | -1.558ⁿˢ | -9.868ⁿˢ | -12.503ⁿˢ | -2.868ⁿˢ | -7.803* | 0.263ⁿˢ | -1.391ⁿˢ | -0.108ⁿˢ | -1.203** | -0.371ⁿˢ | -0.151ⁿˢ |
| EC 240806 x CO 9 | -1.17ns | 9.065** | 0.019ⁿˢ | 1.278ⁿˢ | 0.477ⁿˢ | 7.496ⁿˢ | -3.211ⁿˢ | -3.625ⁿˢ | 5.257ⁿˢ | -6.109ⁿˢ | -0.226ⁿˢ | 0.313ⁿˢ | 1.035** | 0.308ⁿˢ |
| EC 240806 x TNFC0926 | 6.4** | -5.748** | 0.101ⁿˢ | 0.28ⁿˢ | 9.391ⁿˢ | 5.007ⁿˢ | 6.079ⁿˢ | 11.428** | -5.52ⁿˢ | 7.5ⁿˢ | 0.334ⁿˢ | 0.89** | -0.665* | -0.157ⁿˢ |
| K – 13 -CP42 x CO(FC) 8 | 12.41** | -6.634** | -0.064ⁿˢ | -0.422ⁿˢ | 33.453** | 1.156ⁿˢ | 4.274ⁿˢ | -7.724* | -6.794ⁿˢ | 7.864ⁿˢ | 0.159ⁿˢ | -1.013** | 0.022ⁿˢ | -0.112ⁿˢ |
| K – 13 -CP42 x CO 9 | -10.25** | -2.399* | -0.106ⁿˢ | -1.268ⁿˢ | -33.385** | 8.032ⁿˢ | -3.76ⁿˢ | 9.555** | 6.961ⁿˢ | -3.544ⁿˢ | 0.127ⁿˢ | 0.52ⁿˢ | 0.272ⁿˢ | 0.32ⁿˢ |
| K – 13 -CP42 x TNFC0926 | -2.16ns | 9.034** | 0.169ⁿˢ | 1.689ⁿˢ | -0.068ⁿˢ | -9.188ⁿˢ | -0.514ⁿˢ | -1.831ⁿˢ | -0.166ⁿˢ | -4.32ⁿˢ | -0.286ⁿˢ | 0.493ⁿˢ | -0.293ⁿˢ | -0.208ⁿˢ |
| GETC 6 x CO(FC) 8 | -4.48** | -6.021** | -0.061ⁿˢ | -0.356ⁿˢ | -17.05ⁿˢ | 0.781ⁿˢ | 2.092ⁿˢ | -0.15ⁿˢ | 5.755ⁿˢ | 2.396ⁿˢ | 0.223ⁿˢ | 0.326ⁿˢ | -0.098ⁿˢ | 0.068ⁿˢ |
| GETC 6 x CO 9 | -6.24** | 11.374** | -0.033ⁿˢ | 0.214ⁿˢ | 24.561* | 5.682ⁿˢ | -2.511ⁿˢ | 8.006* | -6.032ⁿˢ | -0.523ⁿˢ | -0.47* | 1.398** | 0.327ⁿˢ | -0.165ⁿˢ |
| GETC 6 x TNFC0926 | 10.7** | -5.352** | 0.094ⁿˢ | 0.142ⁿˢ | -7.511ⁿˢ | -6.463ⁿˢ | 0.419ⁿˢ | -7.857* | 0.277ⁿˢ | -1.873ⁿˢ | 0.246ⁿˢ | -1.724** | -0.229ⁿˢ | 0.097ⁿˢ |
| GETC10 x CO(FC) 8 | -0.5ns | 7.0** | 0.027ⁿˢ | 1.443ⁿˢ | -0.176ⁿˢ | -0.276ⁿˢ | 3.598ⁿˢ | -9.155* | 0.158ⁿˢ | 1.37ⁿˢ | 0.458* | -0.35ⁿˢ | 0.338ⁿˢ | 0.16ⁿˢ |
| GETC10 x CO 9 | -4.2** | -2.066* | -0.072ⁿˢ | -0.585ⁿˢ | -19.564ⁿˢ | 1.588ⁿˢ | -5.079ⁿˢ | 10.264** | 4.385ⁿˢ | 2.672ⁿˢ | -0.437* | 0.126ⁿˢ | -0.594* | 0.074ⁿˢ |
| GETC10 x TNFC0926 | 4.79** | -4.934** | 0.045ⁿˢ | -0.859ⁿˢ | 19.74ⁿˢ | -1.312ⁿˢ | 1.481ⁿˢ | -1.109ⁿˢ | -4.543ⁿˢ | -4.042ⁿˢ | -0.021ⁿˢ | 0.224ⁿˢ | 0.256ⁿˢ | -0.234ⁿˢ |
| GETC 15 x CO(FC) 8 | 2.63* | -5.179** | -0.076ⁿˢ | -0.669ⁿˢ | 4.604ⁿˢ | 9.091ⁿˢ | -9.662** | 6.235ⁿˢ | 0.747ⁿˢ | -2.932ⁿˢ | -0.409* | 1.271** | -0.474ⁿˢ | -0.459ⁿˢ |
| GETC 15 x CO 9 | 14.76** | -1.996* | 0.001ⁿˢ | 0.914ⁿˢ | -9.451ⁿˢ | 15.348ⁿˢ | 7.861* | -3.324ⁿˢ | -5.657ⁿˢ | 4.159ⁿˢ | -0.033ⁿˢ | 0.079ⁿˢ | 0.055ⁿˢ | 0.619ⁿˢ |
| GETC 15 x TNFC0926 | -17.39** | 7.174** | 0.075ⁿˢ | -0.246ⁿˢ | 4.848ⁿˢ | -24.439* | 1.8ⁿˢ | -2.911ⁿˢ | 4.91ⁿˢ | -1.227ⁿˢ | 0.442* | -1.35** | 0.419ⁿˢ | -0.159ⁿˢ |

Table 6 (Continued)

| Genotype | **ASH** |  | **CPR** |  | **CFB** |  | **CFT** |  | **NPB** |  | **LSR** |  |
| --- | --- | --- | --- | --- | --- | --- | --- | --- | --- | --- | --- | --- |
| FD 1067 x CO(FC) 8 | 0.296ⁿˢ | 0.146ⁿˢ | 0.131ⁿˢ | -0.261ⁿˢ | -0.433ⁿˢ | 0.256ⁿˢ | 0.14ⁿˢ | 0.076ⁿˢ | 0.016ⁿˢ | 0.013ⁿˢ | -0.13** | -0.01ⁿˢ |
| FD 1067 x CO 9 | 0.462ⁿˢ | 0.099ⁿˢ | 0.108ⁿˢ | 0.321ⁿˢ | 0.39ⁿˢ | 0.129ⁿˢ | -0.062ⁿˢ | -0.107ⁿˢ | -0.003ⁿˢ | -0.001ⁿˢ | 0.09ⁿˢ | 0.007ⁿˢ |
| FD 1067 x TNFC0926 | -0.166ⁿˢ | -0.245ⁿˢ | -0.239ⁿˢ | -0.06ⁿˢ | 0.043ⁿˢ | -0.384ⁿˢ | -0.077ⁿˢ | 0.031ⁿˢ | -0.013ⁿˢ | -0.012ⁿˢ | 0.041ⁿˢ | 0.002ⁿˢ |
| FD 1259 x CO(FC) 8 | -0.179ⁿˢ | -0.404ⁿˢ | 0.109ⁿˢ | 0.038ⁿˢ | -0.134ⁿˢ | -0.132ⁿˢ | 0.332ⁿˢ | -0.278ⁿˢ | 0.01ⁿˢ | 0.007ⁿˢ | 0.062ⁿˢ | -0.022ⁿˢ |
| FD 1259 x CO 9 | 0.112ⁿˢ | 0.554* | -0.362ⁿˢ | -0.08ⁿˢ | -0.011ⁿˢ | -0.011ⁿˢ | -0.793* | -0.002ⁿˢ | -0.004ⁿˢ | -0.001ⁿˢ | 0.06ⁿˢ | 0.047ⁿˢ |
| FD 1259 x TNFC0926 | 0.067ⁿˢ | -0.151ⁿˢ | 0.253ⁿˢ | 0.042ⁿˢ | 0.146ⁿˢ | 0.143ⁿˢ | 0.461ⁿˢ | 0.279ⁿˢ | -0.007ⁿˢ | -0.006ⁿˢ | -0.122* | -0.025ⁿˢ |
| EC 467380 x CO(FC) 8 | 0.008ⁿˢ | 0.323ⁿˢ | -0.085ⁿˢ | 0.366ⁿˢ | 0.194ⁿˢ | -0.208ⁿˢ | 0.582ⁿˢ | 0.202ⁿˢ | -0.001ⁿˢ | 0.0ⁿˢ | 0.029ⁿˢ | 0.003ⁿˢ |
| EC 467380 x CO 9 | -0.127ⁿˢ | -0.691** | 0.017ⁿˢ | -0.23ⁿˢ | -0.161ⁿˢ | -0.029ⁿˢ | -0.316ⁿˢ | -0.074ⁿˢ | -0.005ⁿˢ | 0.0ⁿˢ | -0.007ⁿˢ | 0.001ⁿˢ |
| EC 467380 x TNFC0926 | 0.118ⁿˢ | 0.367ⁿˢ | 0.068ⁿˢ | -0.137ⁿˢ | -0.033ⁿˢ | 0.237ⁿˢ | -0.266ⁿˢ | -0.128ⁿˢ | 0.007ⁿˢ | 0.0ⁿˢ | -0.022ⁿˢ | -0.003ⁿˢ |
| EC 240806 x CO(FC) 8 | 0.194ⁿˢ | 0.047ⁿˢ | 0.131ⁿˢ | 0.208ⁿˢ | 0.036ⁿˢ | -0.513ⁿˢ | -0.361ⁿˢ | -0.243ⁿˢ | 0.002ⁿˢ | -0.005ⁿˢ | -0.079ⁿˢ | -0.015ⁿˢ |
| EC 240806 x CO 9 | -0.058ⁿˢ | -0.309ⁿˢ | 0.108ⁿˢ | -0.022ⁿˢ | 0.047ⁿˢ | 0.209ⁿˢ | 0.99** | -0.02ⁿˢ | -0.007ⁿˢ | -0.001ⁿˢ | 0.07ⁿˢ | -0.048ⁿˢ |
| EC 240806 x TNFC0926 | -0.136ⁿˢ | 0.262ⁿˢ | -0.239ⁿˢ | -0.186ⁿˢ | -0.083ⁿˢ | 0.305ⁿˢ | -0.63ⁿˢ | 0.263ⁿˢ | 0.005ⁿˢ | 0.006ⁿˢ | 0.009ⁿˢ | 0.063ⁿˢ |
| K – 13 -CP42 x CO(FC) 8 | 0.096ⁿˢ | 0.314ⁿˢ | 0.109ⁿˢ | 0.047ⁿˢ | -0.125ⁿˢ | -0.015ⁿˢ | -0.06ⁿˢ | 0.101ⁿˢ | -0.015ⁿˢ | -0.012ⁿˢ | -0.086ⁿˢ | -0.024ⁿˢ |
| K – 13 -CP42 x CO 9 | -0.092ⁿˢ | 0.044ⁿˢ | -0.362ⁿˢ | -0.195ⁿˢ | -0.126ⁿˢ | 0.443ⁿˢ | 0.114ⁿˢ | -0.18ⁿˢ | 0.004ⁿˢ | 0.0ⁿˢ | -0.012ⁿˢ | 0.045ⁿˢ |
| K – 13 -CP42 x TNFC0926 | -0.004ⁿˢ | -0.358ⁿˢ | 0.253ⁿˢ | 0.148ⁿˢ | 0.251ⁿˢ | -0.428ⁿˢ | -0.054ⁿˢ | 0.079ⁿˢ | 0.011ⁿˢ | 0.012ⁿˢ | 0.098* | -0.021ⁿˢ |
| GETC 6 x CO(FC) 8 | 0.122ⁿˢ | 0.379ⁿˢ | -0.085ⁿˢ | 0.253ⁿˢ | 0.081ⁿˢ | -0.496ⁿˢ | -0.188ⁿˢ | 0.004ⁿˢ | -0.016ⁿˢ | -0.018ⁿˢ | -0.04ⁿˢ | -0.021ⁿˢ |
| GETC 6 x CO 9 | 0.047ⁿˢ | -0.553* | 0.017ⁿˢ | 0.39ⁿˢ | 0.459ⁿˢ | 0.497ⁿˢ | -0.049ⁿˢ | 0.059ⁿˢ | 0.002ⁿˢ | 0.0ⁿˢ | -0.113* | 0.035ⁿˢ |
| GETC 6 x TNFC0926 | -0.168ⁿˢ | 0.174ⁿˢ | 0.068ⁿˢ | -0.643ⁿˢ | -0.54ⁿˢ | 0.0ⁿˢ | 0.237ⁿˢ | -0.063ⁿˢ | 0.015ⁿˢ | 0.018ⁿˢ | 0.153** | -0.015ⁿˢ |
| GETC10 x CO(FC) 8 | 0.029ⁿˢ | 0.613** | -0.162ⁿˢ | 0.006ⁿˢ | -0.166ⁿˢ | -0.49ⁿˢ | 0.11ⁿˢ | 0.209ⁿˢ | -0.023ⁿˢ | -0.023ⁿˢ | 0.074ⁿˢ | 0.011ⁿˢ |
| GETC10 x CO 9 | -0.219ⁿˢ | -0.52* | 0.279ⁿˢ | 0.276ⁿˢ | 0.345ⁿˢ | 0.405ⁿˢ | -0.013ⁿˢ | 0.01ⁿˢ | 0.0ⁿˢ | 0.0ⁿˢ | 0.0ⁿˢ | -0.03ⁿˢ |
| GETC10 x TNFC0926 | 0.19ⁿˢ | -0.093ⁿˢ | -0.117ⁿˢ | -0.283ⁿˢ | -0.179ⁿˢ | 0.086ⁿˢ | -0.097ⁿˢ | -0.219ⁿˢ | 0.022ⁿˢ | 0.024ⁿˢ | -0.074ⁿˢ | 0.018ⁿˢ |
| GETC 15 x CO(FC) 8 | 0.047ⁿˢ | -0.254ⁿˢ | 0.347ⁿˢ | -0.365ⁿˢ | -0.538ⁿˢ | 0.148ⁿˢ | -0.399ⁿˢ | -0.147ⁿˢ | -0.024ⁿˢ | -0.03ⁿˢ | -0.037ⁿˢ | 0.015ⁿˢ |
| GETC 15 x CO 9 | -0.108ⁿˢ | -0.116ⁿˢ | -0.192ⁿˢ | -0.628ⁿˢ | -0.559ⁿˢ | -0.107ⁿˢ | 0.11ⁿˢ | -0.16ⁿˢ | -0.005ⁿˢ | 0.0ⁿˢ | -0.044ⁿˢ | -0.003ⁿˢ |
| GETC 15 x TNFC0926 | 0.061ⁿˢ | 0.37ⁿˢ | -0.155ⁿˢ | 0.994** | 1.097* | -0.041ⁿˢ | 0.289ⁿˢ | 0.307ⁿˢ | 0.029ⁿˢ | 0.03ⁿˢ | 0.081ⁿˢ | -0.012ⁿˢ |

Table 6 (Continued)

| **Genotype** | **DMY** |  | **DFF** |  | **GFY** |  | **PH** |  | **NOL** |  | **LL** |  | **LW** |  |
| --- | --- | --- | --- | --- | --- | --- | --- | --- | --- | --- | --- | --- | --- | --- |
| GETC 18 x CO(FC) 8 | 0.26ns | 1.309ns | -0.007ⁿˢ | 0.735ⁿˢ | 8.159ⁿˢ | -7.02ⁿˢ | 3.363ⁿˢ | -7.565* | 7.027ⁿˢ | -1.32ⁿˢ | -0.216ⁿˢ | -0.582* | -0.176ⁿˢ | 0.32ⁿˢ |
| GETC 18 x CO 9 | 2.09ns | -4.993** | -0.078ⁿˢ | -0.713ⁿˢ | 13.437ⁿˢ | 0.324ⁿˢ | 2.228ⁿˢ | 15.69** | -5.43ⁿˢ | 2.469ⁿˢ | 0.764** | -1.00** | -0.384ⁿˢ | -0.50ⁿˢ |
| GETC 18 x TNFC0926 | -2.36ns | 3.685** | 0.086ⁿˢ | -0.022ⁿˢ | -21.596ⁿˢ | 6.696ⁿˢ | -5.591ⁿˢ | -8.125* | -1.59ⁿˢ | -1.14ⁿˢ | -0.54** | 1.584** | 0.56* | 0.186ⁿˢ |
| GETC 21 x CO(FC) 8 | -2.88* | 7.267** | 0.057ⁿˢ | 2.055ⁿˢ | 63.878** | -17.65ⁿˢ | -3.553ⁿˢ | 13.318** | 3.577ⁿˢ | -2.48ⁿˢ | -0.358ⁿˢ | 0.126ⁿˢ | 0.225ⁿˢ | -0.07ⁿˢ |
| GETC 21 x CO 9 | 0.85ns | -3.829** | -0.119ⁿˢ | -1.549ⁿˢ | -19.582ⁿˢ | -4.821ⁿˢ | -0.676ⁿˢ | 12.993** | -9.21ⁿˢ | 0.809ⁿˢ | -0.239ⁿˢ | 0.243ⁿˢ | -0.482ⁿˢ | -0.32ⁿˢ |
| GETC 21 x TNFC0926 | 2.02ns | -3.438** | 0.062ⁿˢ | -0.506ⁿˢ | -44.29** | 22.474* | 4.23ⁿˢ | -26.31** | 5.634ⁿˢ | 1.68ⁿˢ | 0.597** | -0.37ⁿˢ | 0.257ⁿˢ | 0.406ⁿˢ |
| GETC 23 x CO(FC) 8 | 1.04ns | -1.693ns | -0.054ⁿˢ | -0.216ⁿˢ | -25.351* | -34.89** | -0.27ⁿˢ | 20.65** | 3.666ⁿˢ | -7.80ⁿˢ | -0.59** | -0.84** | -0.617* | 0.337ⁿˢ |
| GETC 23 x CO 9 | 0.1ns | 7.128** | -0.026ⁿˢ | 0.359ⁿˢ | 8.652ⁿˢ | 8.551ⁿˢ | 0.25ⁿˢ | -18.97** | -2.72ⁿˢ | 3.208ⁿˢ | 0.577** | -0.467ⁿˢ | 0.743** | -0.14ⁿˢ |
| GETC 23 x TNFC0926 | -1.20ns | -5.435** | 0.08ⁿˢ | -0.143ⁿˢ | 16.699ⁿˢ | 26.278* | 0.02ⁿˢ | -1.671ⁿˢ | -0.94ⁿˢ | 4.6ⁿˢ | 0.019ⁿˢ | 1.313** | -0.127ⁿˢ | -0.18ⁿˢ |
| GETC 40 x CO(FC) 8 | -1.88ns | -0.249ns | -0.037ⁿˢ | 0.131ⁿˢ | -3.683ⁿˢ | 11.012ⁿˢ | 2.704ⁿˢ | -5.005ⁿˢ | -1.98ⁿˢ | 0.419ⁿˢ | -0.215ⁿˢ | -1.48** | -0.113ⁿˢ | -0.26ⁿˢ |
| GETC 40 x CO 9 | -0.12ns | 2.561* | -0.036ⁿˢ | 0.149ⁿˢ | -9.072ⁿˢ | 6.208ⁿˢ | 2.054ⁿˢ | -15.80** | -1.87ⁿˢ | -2.17ⁿˢ | -0.234ⁿˢ | 2.252** | -0.89** | -0.17ⁿˢ |
| GETC 40 x TNFC0926 | 2.0ns | -2.312* | 0.073ⁿˢ | -0.28ⁿˢ | 12.755ⁿˢ | -17.22ⁿˢ | -4.758ⁿˢ | 20.81** | 3.859ⁿˢ | 1.759ⁿˢ | 0.449* | -0.77** | 1.013** | 0.441ⁿˢ |
| GETC 41 x CO(FC) 8 | -3.9** | 9.834** | -0.025ⁿˢ | 0.369ⁿˢ | -12.839ⁿˢ | 7.55ⁿˢ | -0.675ⁿˢ | 4.803ⁿˢ | 5.389ⁿˢ | -4.63ⁿˢ | -0.12ⁿˢ | 0.772** | -0.681* | 0.598ⁿˢ |
| GETC 41 x CO 9 | 3.2* | 2.193* | -0.086ⁿˢ | -0.871ⁿˢ | 43.772** | -9.138ⁿˢ | -1.827ⁿˢ | -14.91** | 1.226ⁿˢ | -0.56ⁿˢ | 0.026ⁿˢ | -0.107ⁿˢ | 0.403ⁿˢ | -0.36ⁿˢ |
| GETC 41 x TNFC0926 | 0.68ns | -12** | 0.111ⁿˢ | 0.502ⁿˢ | -30.93** | 1.588ⁿˢ | 2.503ⁿˢ | 10.108** | -6.61ⁿˢ | 5.203ⁿˢ | 0.094ⁿˢ | -0.666* | 0.278ⁿˢ | -0.23ⁿˢ |
| GETC 49 x CO(FC) 8 | 1.8ns | -0.113ns | 1.227** | 4.675** | 9.494ⁿˢ | 14.354ⁿˢ | -0.491ⁿˢ | 5.391ⁿˢ | -2.93ⁿˢ | -0.98ⁿˢ | 0.412* | -0.154ⁿˢ | 0.093ⁿˢ | -0.15ⁿˢ |
| GETC 49 x CO 9 | -3.5** | -4.491** | 1.205** | 4.25** | 16.439ⁿˢ | 3.278ⁿˢ | 1.138ⁿˢ | -6.387ⁿˢ | 9.397ⁿˢ | -0.01ⁿˢ | 0.034ⁿˢ | 0.237ⁿˢ | 0.079ⁿˢ | 0.29ⁿˢ |
| GETC 49 x TNFC0926 | 1.6ns | 4.604** | -2.432** | -8.925** | -25.934* | -17.63ⁿˢ | -0.646ⁿˢ | 0.996ⁿˢ | -6.46ⁿˢ | 0.993ⁿˢ | -0.446* | -0.084ⁿˢ | -0.172ⁿˢ | -0.13ⁿˢ |

| Genotype | ASH |  | CPR |  | CFB |  | CFT | |  | NPB |  | | LSR |  |
| --- | --- | --- | --- | --- | --- | --- | --- | --- | --- | --- | --- | --- | --- | --- |
| GETC 18 x CO(FC) 8 | -0.227ⁿˢ | -0.061ⁿˢ | -0.041ⁿˢ | 0.225ⁿˢ | 0.053ⁿˢ | -0.287ⁿˢ | | 0.158ⁿˢ | 0.08ⁿˢ | -0.033ⁿˢ | -0.036ⁿˢ | 0.041ⁿˢ | | 0.014ⁿˢ | |
| GETC 18 x CO 9 | 0.001ⁿˢ | 0.681** | 0.226ⁿˢ | -0.023ⁿˢ | 0.046ⁿˢ | 0.082ⁿˢ | | -0.294ⁿˢ | -0.418ⁿˢ | 0.0ⁿˢ | 0.0ⁿˢ | -0.07ⁿˢ | | 0.009ⁿˢ | |
| GETC 18 x TNFC0926 | 0.226ⁿˢ | -0.62** | -0.185ⁿˢ | -0.202ⁿˢ | -0.099ⁿˢ | 0.205ⁿˢ | | 0.136ⁿˢ | 0.338ⁿˢ | 0.034ⁿˢ | 0.037ⁿˢ | 0.028ⁿˢ | | -0.024ⁿˢ | |
| GETC 21 x CO(FC) 8 | -0.149ⁿˢ | -0.202ⁿˢ | 0.147ⁿˢ | 0.124ⁿˢ | -0.049ⁿˢ | 0.185ⁿˢ | | 0.352ⁿˢ | 0.366ⁿˢ | -0.037ⁿˢ | -0.041ⁿˢ | 0.076ⁿˢ | | -0.03ⁿˢ | |
| GETC 21 x CO 9 | -0.175ⁿˢ | -0.323ⁿˢ | -0.154ⁿˢ | -0.226ⁿˢ | -0.157ⁿˢ | -0.327ⁿˢ | | -0.091ⁿˢ | -0.096ⁿˢ | -0.001ⁿˢ | 0.0ⁿˢ | -0.038ⁿˢ | | 0.032ⁿˢ | |
| GETC 21 x TNFC0926 | 0.324ⁿˢ | 0.525* | 0.007ⁿˢ | 0.102ⁿˢ | 0.206ⁿˢ | 0.142ⁿˢ | | -0.261ⁿˢ | -0.27ⁿˢ | 0.038ⁿˢ | 0.041ⁿˢ | -0.039ⁿˢ | | -0.001ⁿˢ | |
| GETC 23 x CO(FC) 8 | 0.041ⁿˢ | -0.441* | 0.127ⁿˢ | 0.094ⁿˢ | -0.078ⁿˢ | -0.023ⁿˢ | | -0.239ⁿˢ | -0.245ⁿˢ | -0.049ⁿˢ | -0.048ⁿˢ | 0.056ⁿˢ | | -0.007ⁿˢ | |
| GETC 23 x CO 9 | -0.011ⁿˢ | 0.494* | -0.314ⁿˢ | -0.026ⁿˢ | 0.043ⁿˢ | -0.029ⁿˢ | | -0.2ⁿˢ | 0.046ⁿˢ | 0.005ⁿˢ | 0.001ⁿˢ | -0.068ⁿˢ | | -0.029ⁿˢ | |
| GETC 23 x TNFC0926 | -0.029ⁿˢ | -0.053ⁿˢ | 0.187ⁿˢ | -0.068ⁿˢ | 0.035ⁿˢ | 0.052ⁿˢ | | 0.438ⁿˢ | 0.2ⁿˢ | 0.044ⁿˢ | 0.048ⁿˢ | 0.012ⁿˢ | | 0.036ⁿˢ | |
| GETC 40 x CO(FC) 8 | -0.094ⁿˢ | -0.06ⁿˢ | -0.298ⁿˢ | 0.118ⁿˢ | -0.054ⁿˢ | 0.029ⁿˢ | | -0.116ⁿˢ | -0.029ⁿˢ | -0.053ⁿˢ | -0.054ⁿˢ | 0.135** | | 0.002ⁿˢ | |
| GETC 40 x CO 9 | -0.029ⁿˢ | -0.317ⁿˢ | -0.187ⁿˢ | -0.189ⁿˢ | -0.12ⁿˢ | 0.107ⁿˢ | | -0.004ⁿˢ | -0.132ⁿˢ | 0.002ⁿˢ | 0.001ⁿˢ | -0.066ⁿˢ | | 0.019ⁿˢ | |
| GETC 40 x TNFC0926 | 0.123ⁿˢ | 0.377ⁿˢ | 0.485ⁿˢ | 0.071ⁿˢ | 0.175ⁿˢ | -0.136ⁿˢ | | 0.119ⁿˢ | 0.16ⁿˢ | 0.051ⁿˢ | 0.054ⁿˢ | -0.069ⁿˢ | | -0.021ⁿˢ | |
| GETC 41 x CO(FC) 8 | -0.089ⁿˢ | 0.035ⁿˢ | -0.339ⁿˢ | -0.111ⁿˢ | -0.283ⁿˢ | -0.04ⁿˢ | | -0.057ⁿˢ | -0.12ⁿˢ | -0.053ⁿˢ | -0.06ⁿˢ | -0.036ⁿˢ | | -0.001ⁿˢ | |
| GETC 41 x CO 9 | -0.078ⁿˢ | -0.057ⁿˢ | 0.35ⁿˢ | -0.33ⁿˢ | -0.261ⁿˢ | 0.117ⁿˢ | | 0.442ⁿˢ | 0.397ⁿˢ | 0.001ⁿˢ | 0.0ⁿˢ | -0.005ⁿˢ | | -0.045ⁿˢ | |
| GETC 41 x TNFC0926 | 0.167ⁿˢ | 0.021ⁿˢ | -0.011ⁿˢ | 0.441ⁿˢ | 0.545ⁿˢ | -0.078ⁿˢ | | -0.385ⁿˢ | -0.277ⁿˢ | 0.052ⁿˢ | 0.059ⁿˢ | 0.041ⁿˢ | | 0.046ⁿˢ | |
| GETC 49 x CO(FC) 8 | 0.587ⁿˢ | 0.568** | 0.246ⁿˢ | 0.036ⁿˢ | -0.136ⁿˢ | -0.089ⁿˢ | | 0.167ⁿˢ | 0.103ⁿˢ | -0.055ⁿˢ | -0.065ⁿˢ | 0.007ⁿˢ | | 0.035ⁿˢ | |
| GETC 49 x CO 9 | 0.255ⁿˢ | -0.049ⁿˢ | -0.369ⁿˢ | 0.1ⁿˢ | 0.169ⁿˢ | 0.065ⁿˢ | | 0.168ⁿˢ | 0.123ⁿˢ | 0.0ⁿˢ | 0.0ⁿˢ | 0.013ⁿˢ | | 0.015ⁿˢ | |
| GETC 49 x TNFC0926 | -0.843* | -0.518* | 0.123ⁿˢ | -0.137ⁿˢ | -0.033ⁿˢ | 0.024ⁿˢ | | -0.335ⁿˢ | -0.227ⁿˢ | 0.055ⁿˢ | 0.065ⁿˢ | -0.021ⁿˢ | | -0.05ⁿˢ | |

* and** and Significant at P=0.05 and P=0.01 levels, respectively .NPB-Number of primary branches per plant, PH-Plant height (cm), NOL-Number of leaves per plant, CFB-Crude fiber content (%), CFT-Crude fat content (%), DMY-Dry matter yield per plant (g), DFF-Days to 50% flowering, CPR-Crude protein content (%), GFY-Green fodder yield per plant (g), LSR- Leaf stem ratio, LL- Leaf length(cm), and LW- Leaf width(cm).
